# Supplementary material for: Rapid hydration and weakening of anhydrite under stress: Implications for natural hydration in the Earth’s crust and mantle
Source: Copernicus journal article supplement (doi:10.5194/egusphere-2023-161), 2023-02-09
Supplement: Supplementary file 1 [file egusphere-2023-161-supplement.pdf]

# Rapid hydration and weakening of anhydrite under stress: Implications for natural hydration in the Earth's crust and mantle

Johanna Heeb<sup>1,2</sup>, David Healy<sup>1</sup>, Nicholas E. Timms<sup>2</sup>, Enrique Gomez-Rivas<sup>3</sup>

## 5 Supplement S

Alternative sample names:

| Ò1   | Ò2   | Ò3   | Ò4   | Ò5   | Ò6   | Ò7   | Ò8   | V    |
|------|------|------|------|------|------|------|------|------|
| BA-3 | BA-4 | AA-5 | BA-1 | BA-2 | BA-5 | AA-2 | AA-3 | V3-5 |

## Figures

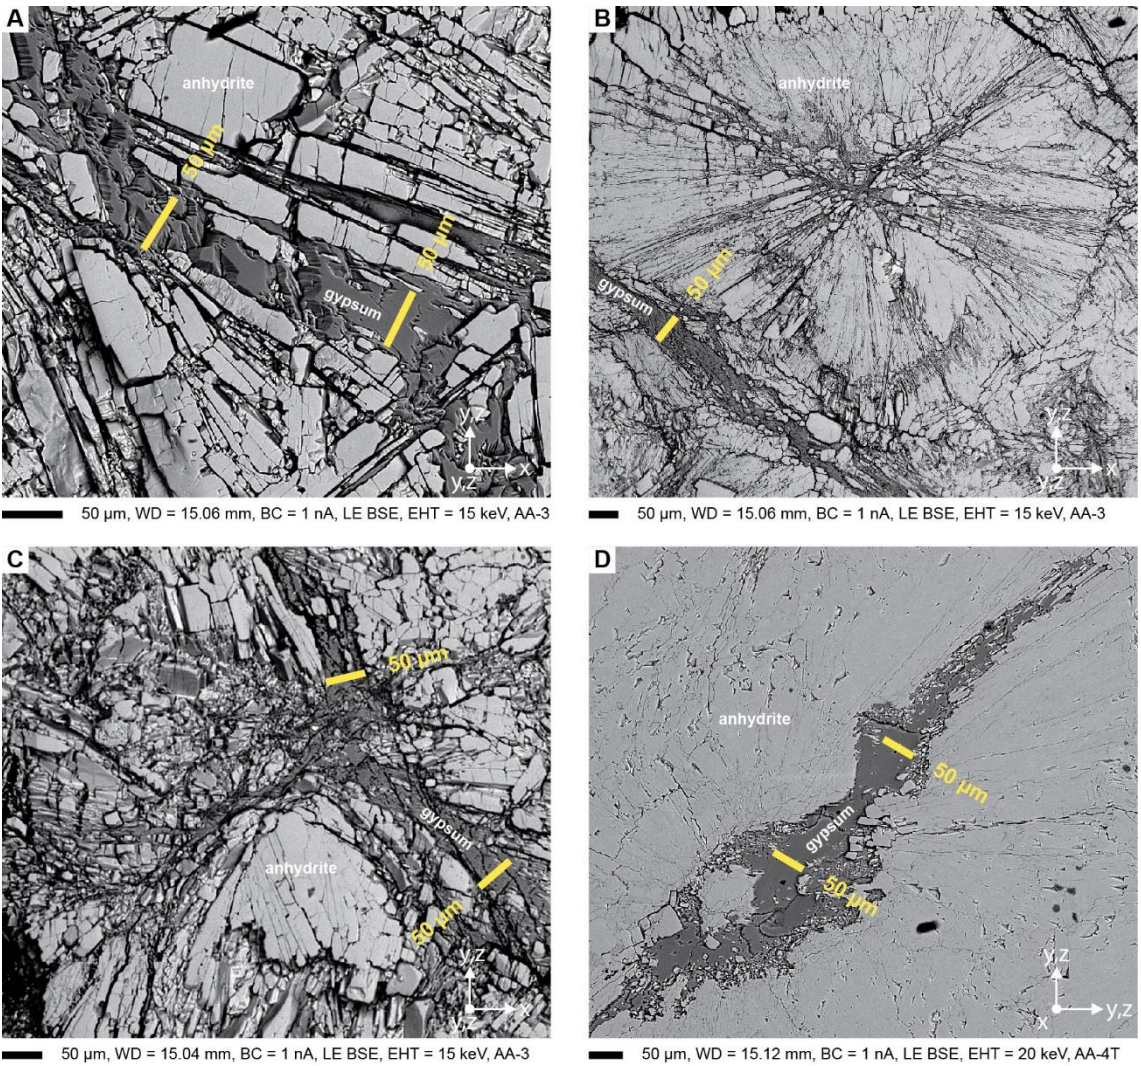

**Fig. S1:** Electron backscatter images of Òdena anhydrite. A: gypsum vein in anhydrite, sample Ò8. B: Gypsum vein next to a spherulite with gypsum in the centre and between grains, sample Ò8. C: Gypsum vein in anhydrite, sample Ò8. D: Gypsum vein cutting through spherulites, sample not used for experiments.



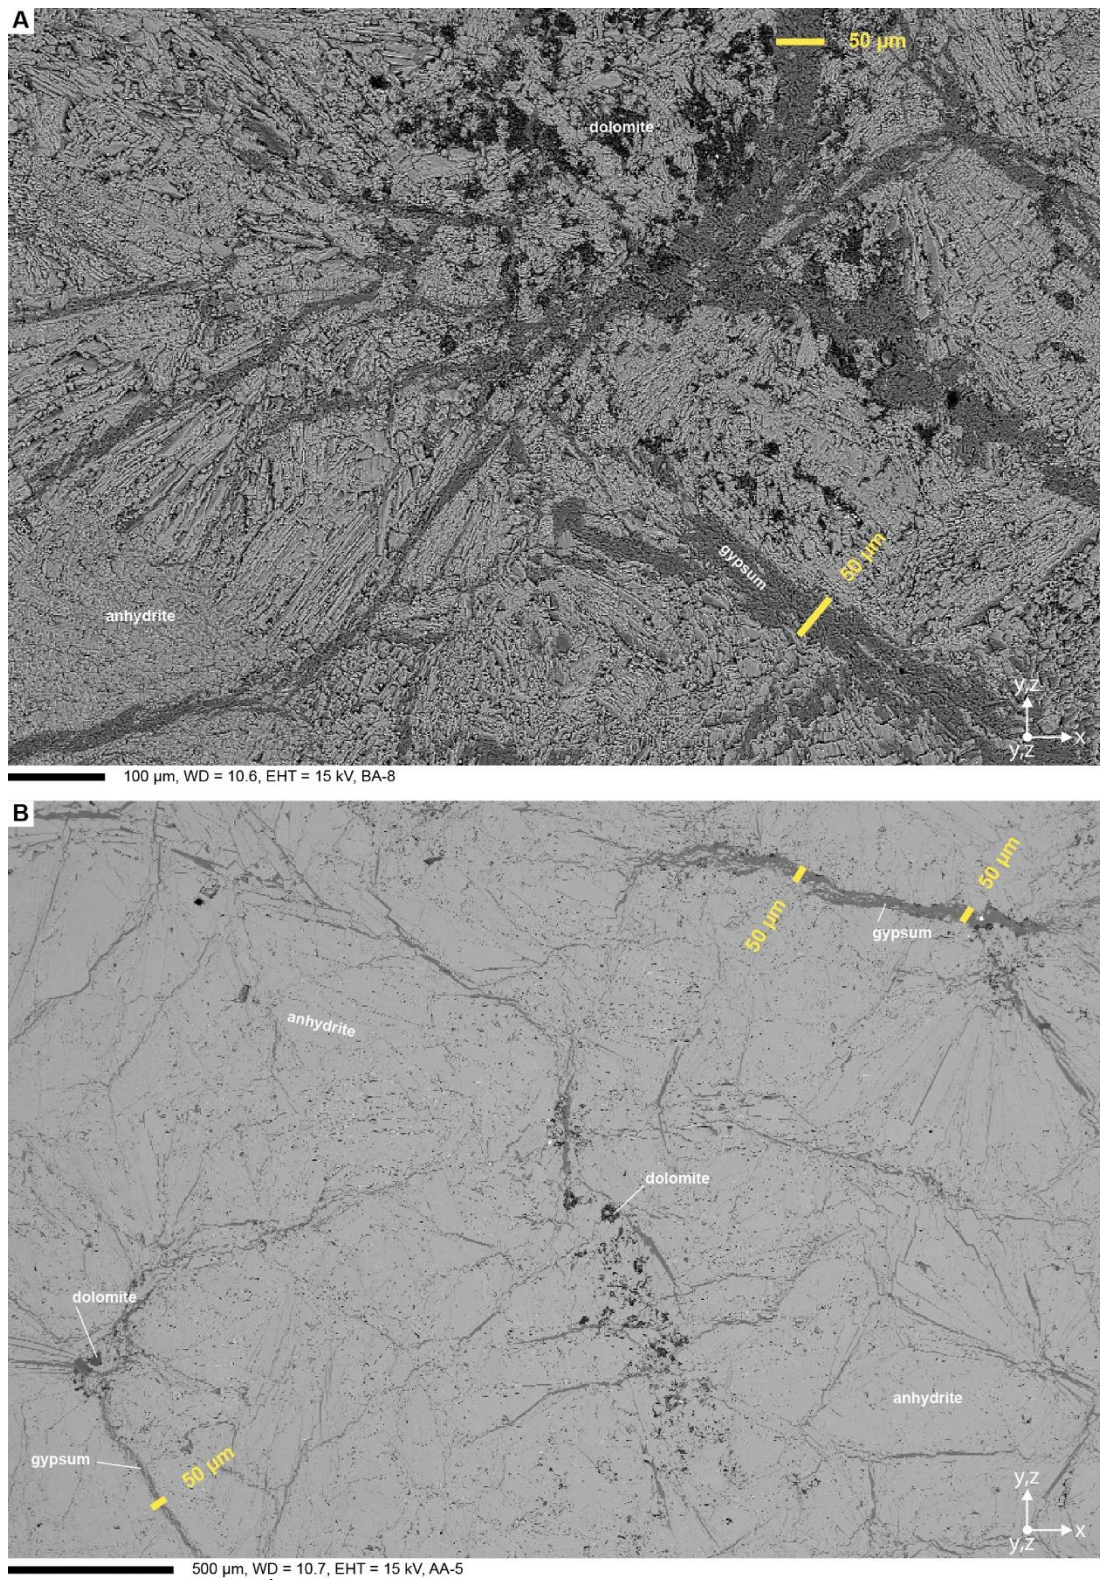

15 Fig. S2: Electron backscatter maps of Odena anhydrite. A: Gypsum vein systems, sample not used for experiments. B: Map of sample 03.



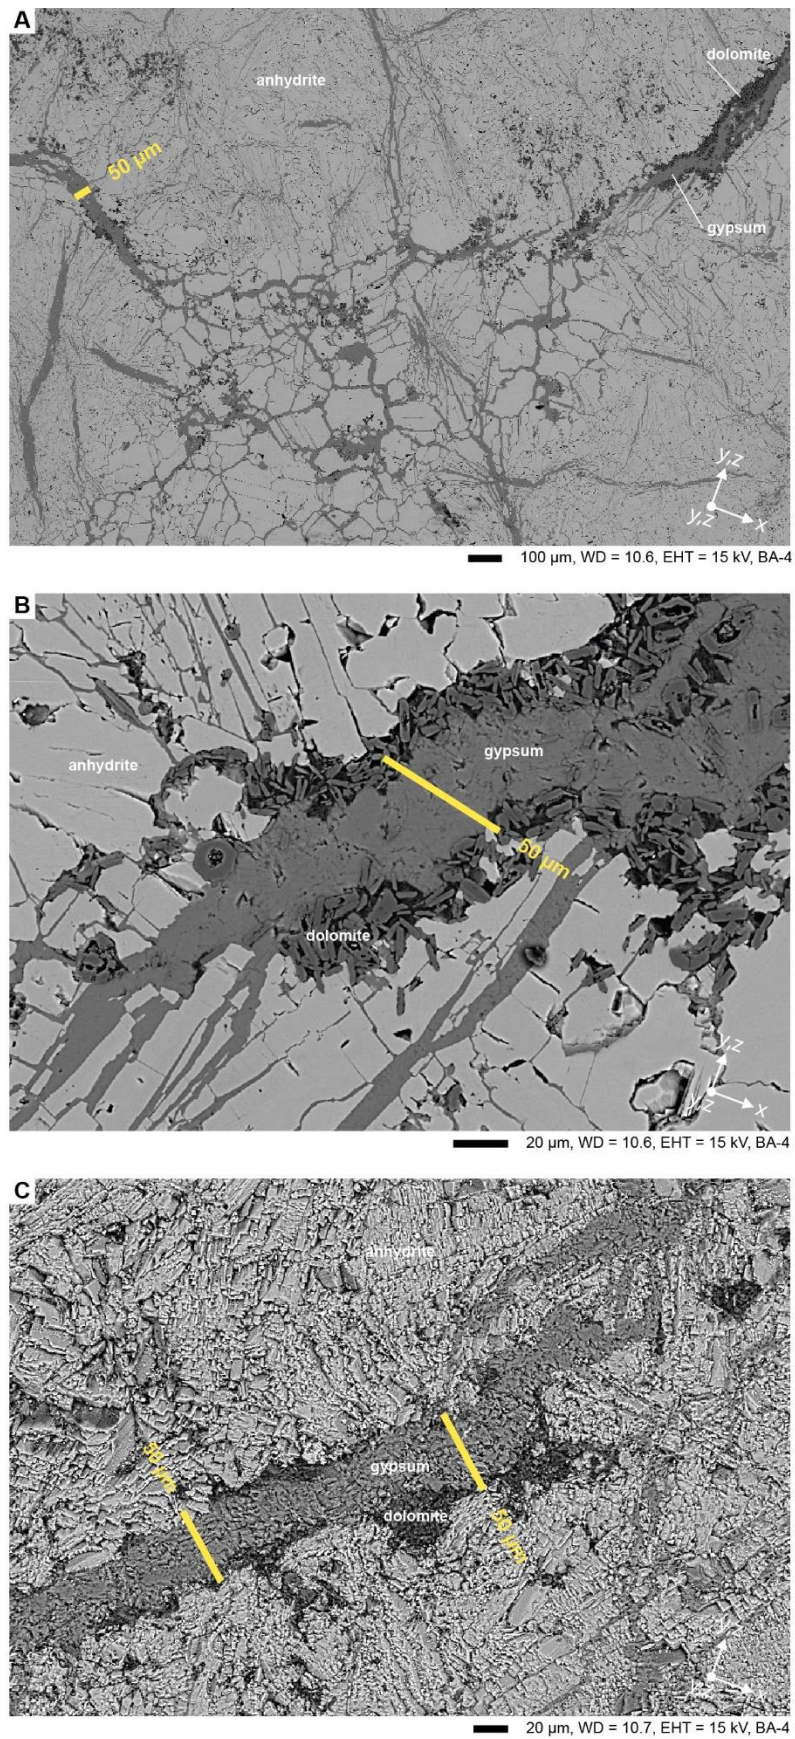

**Fig. S3: Electron backscatter images of Òdena anhydrite sample 02.**



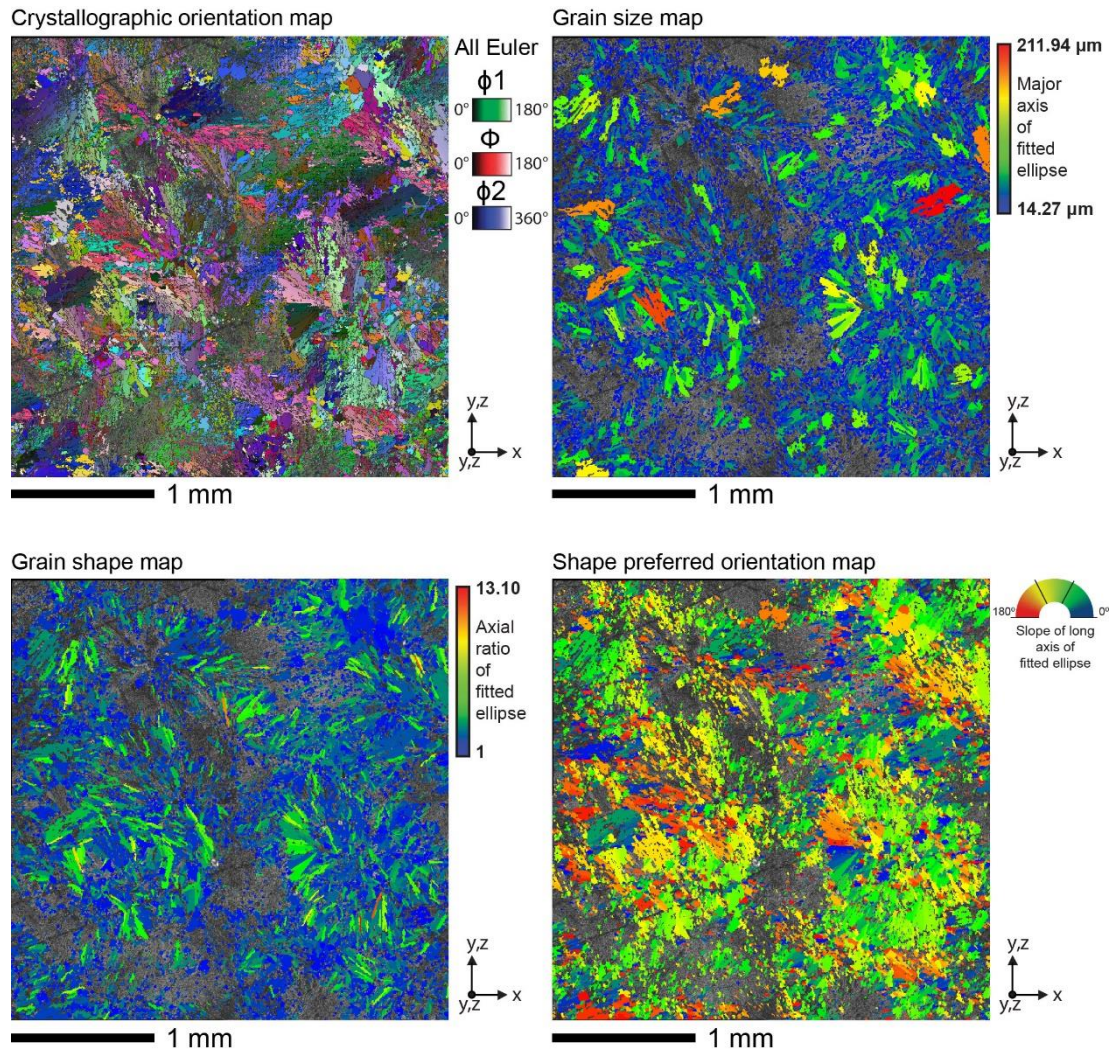

Fig. S4: Electron backscatter diffraction analysis of initial Òdena anhydrite sample material. See Fig. 2c) and d) for IPF<sub>x</sub> EBSD map and equal area, lower hemisphere pole figures of anhydrite. Step size was 4  $\mu\text{m}$ .



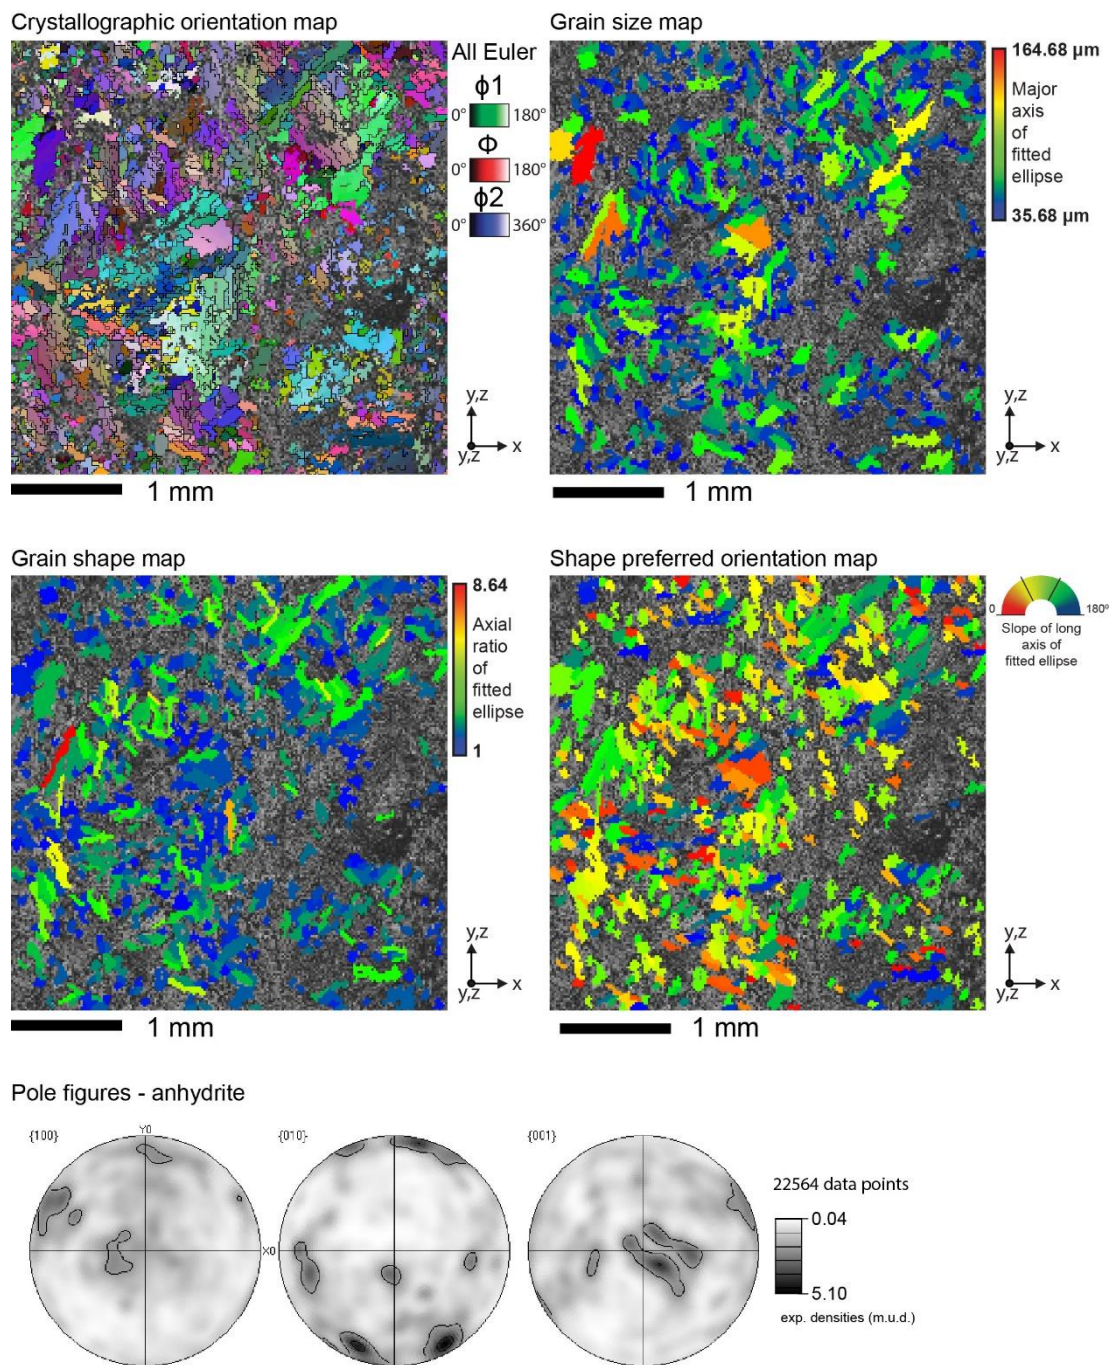

**Fig. S5: Electron backscatter diffraction analysis of initial Ödena anhydrite sample material, including equal area, lower hemisphere pole figures of anhydrite. Step size was 10  $\mu\text{m}$ .**

30

35



40    Ò1 (BA-3, ssdc)

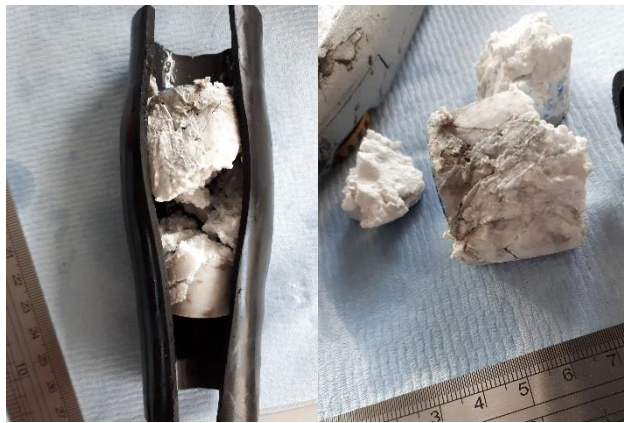

Ò3 (AA-5, 'wet')

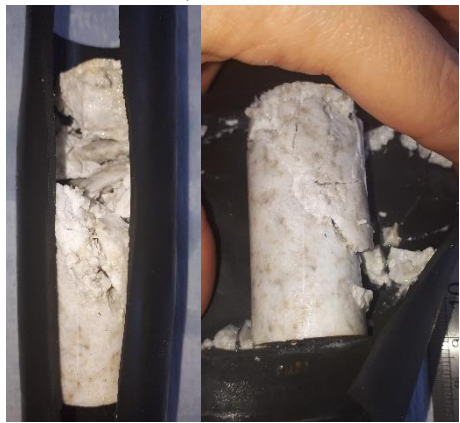

Ò4 (BA-1, 'wet')

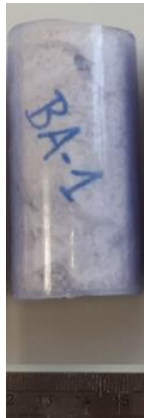

Ò5 (BA-2, 'wet')

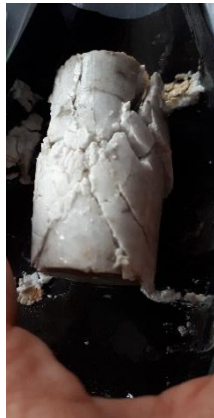

Ò7 (AA-2, dry)

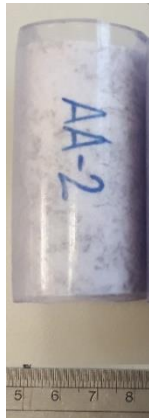

V (V3-5, dry)

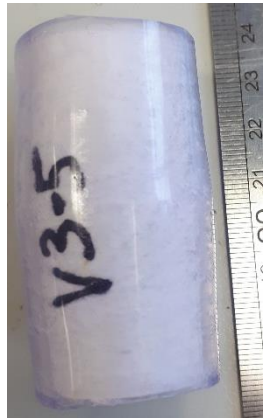

**Fig. S6: Photographs of post-experiment cores after undergoing all three test modes.**



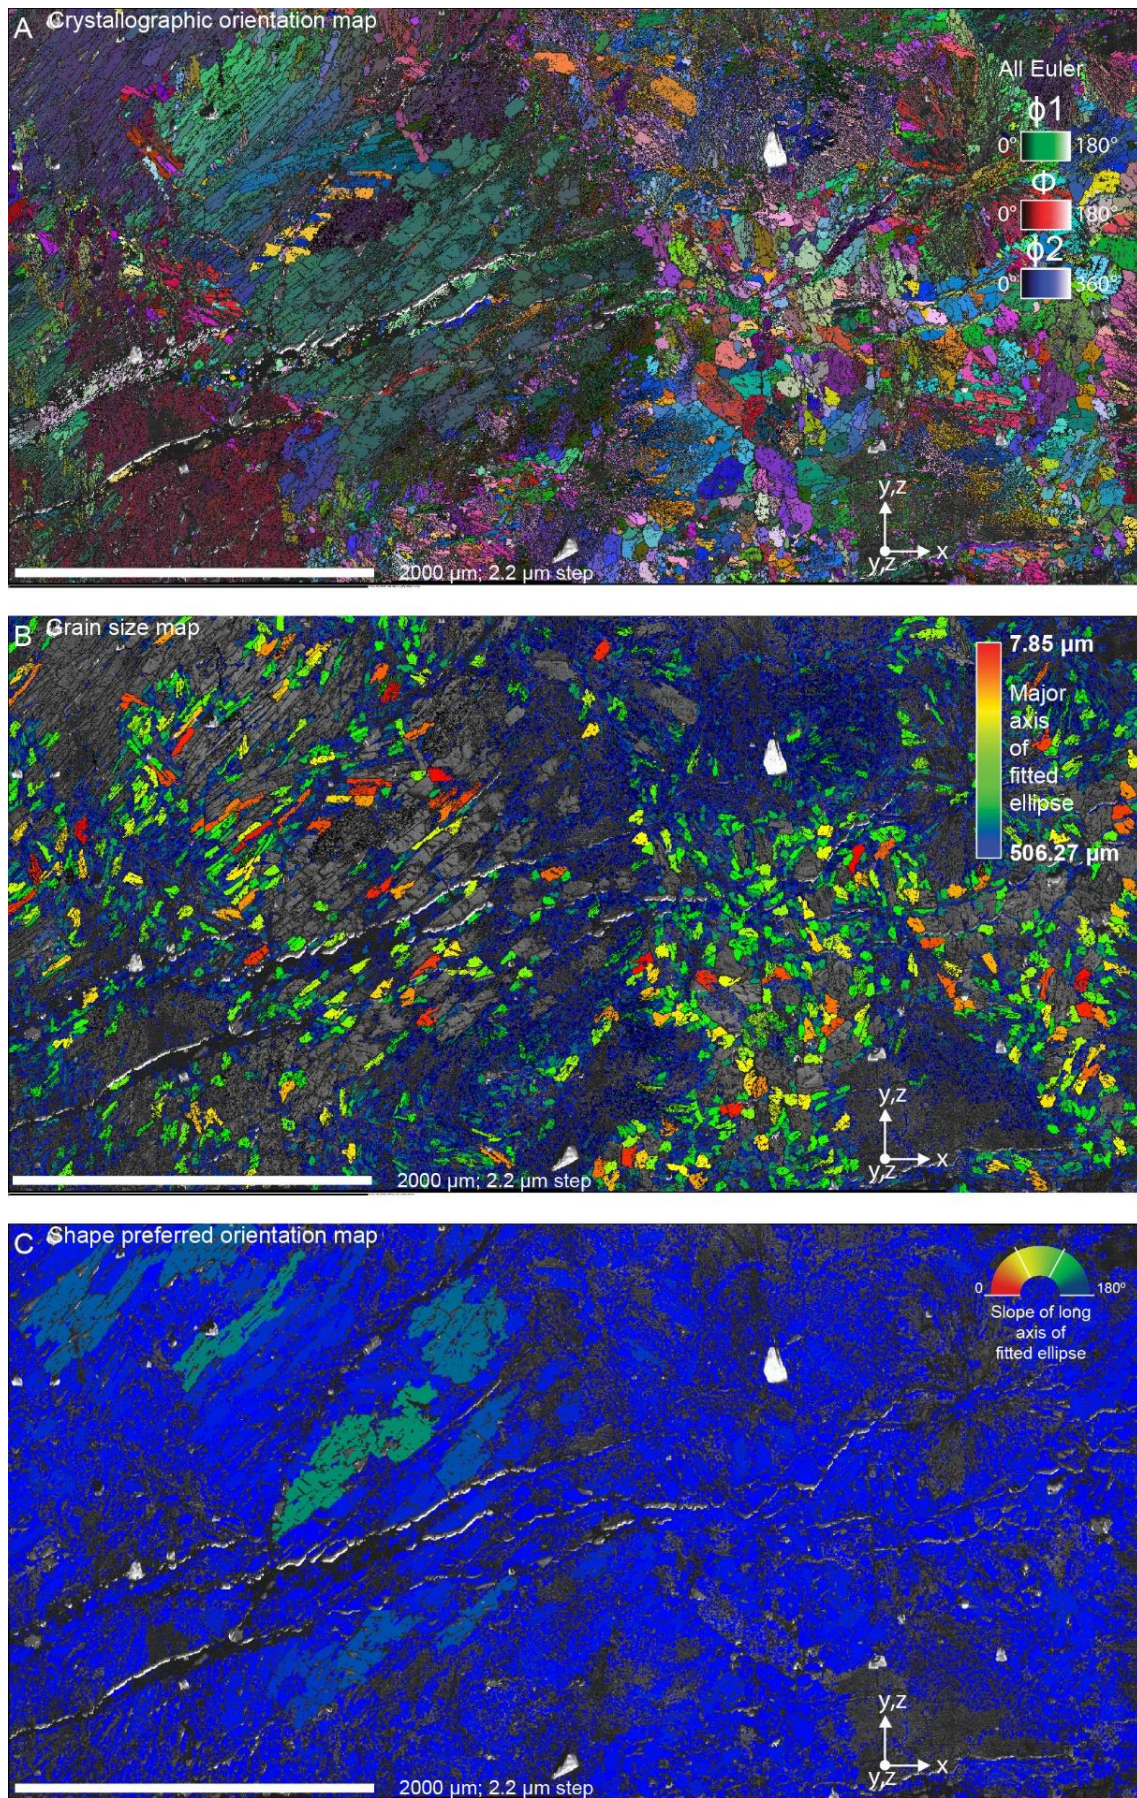

$$\sigma_1 \rightarrow \leftarrow \sigma_1$$

Fig. S7: Additional electron backscatter diffraction analysis from the area of sample O3 ('wet' mode experiment).



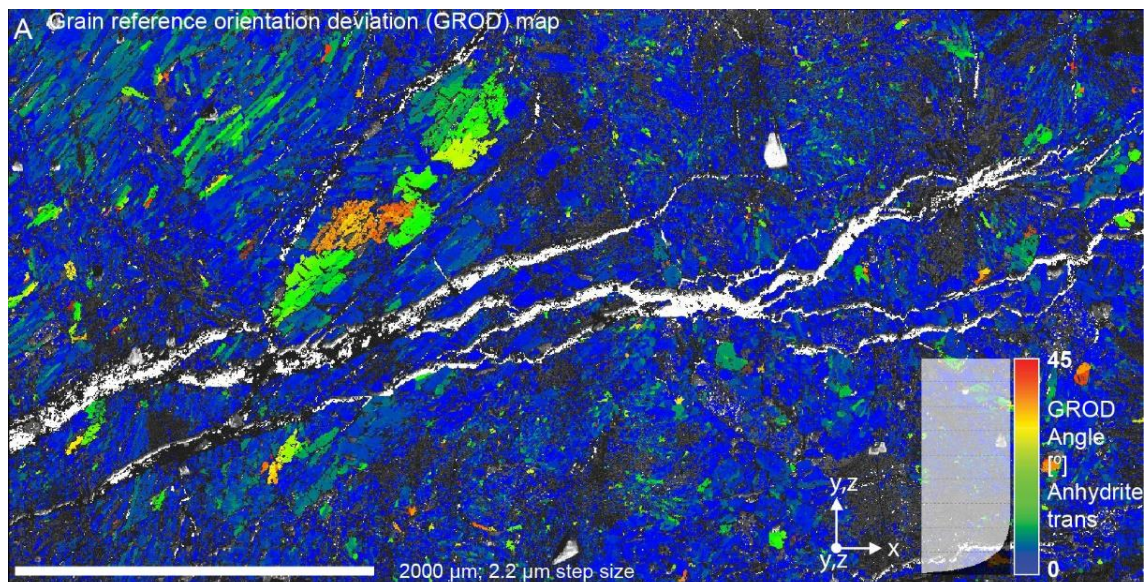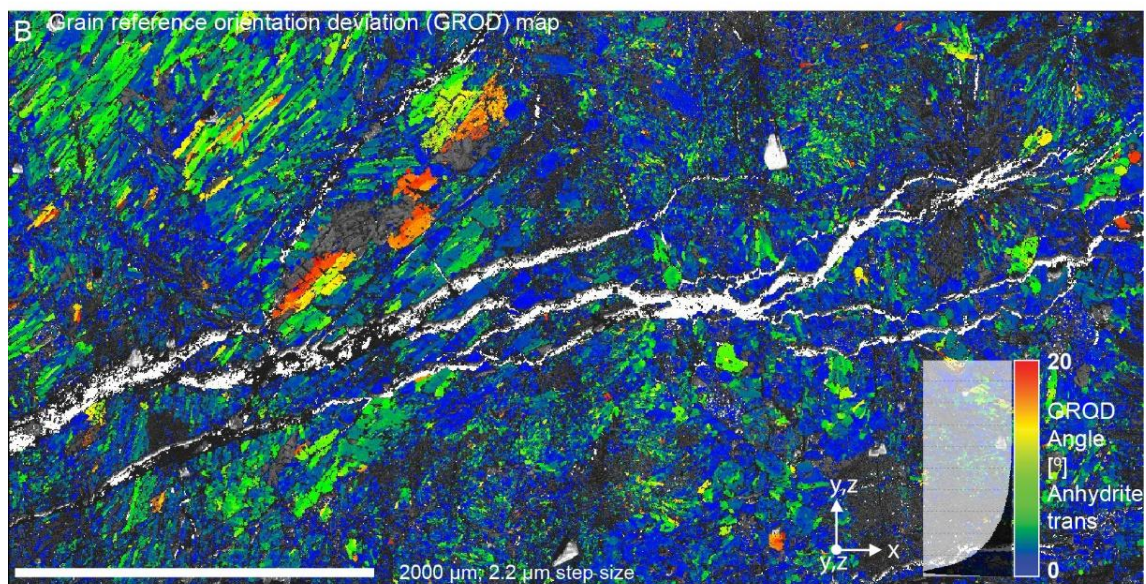

$$\sigma_1 \rightarrow \leftarrow \sigma_1$$

Fig. S8: Grain reference orientation deviation (GROD) maps of anhydrite from the Area 1 electron backscatter diffraction dataset of Ö3 ('wet' mode experiment). GROD analysis shows orientation heterogeneities that form during deformation, and hence displays internal deformation of grains. Each pixel is coloured based on the misorientation of the point relative to a reference orientation for the grain to which the point belongs to. Component limits (GROD angle) were at a range of 0 to 45° for A and to 0 to 20° for B. Exclusion of higher angles results in loss of data and is more sensitive to low angle heterogeneities.

GROD analysis shows that the blocky area has slightly higher internal deformation, with angles ~40° in one large grain and ~20° in surrounding grains. The rest of the anhydrite appears heterogeneous, with GROD angles commonly between 0 and 15°.



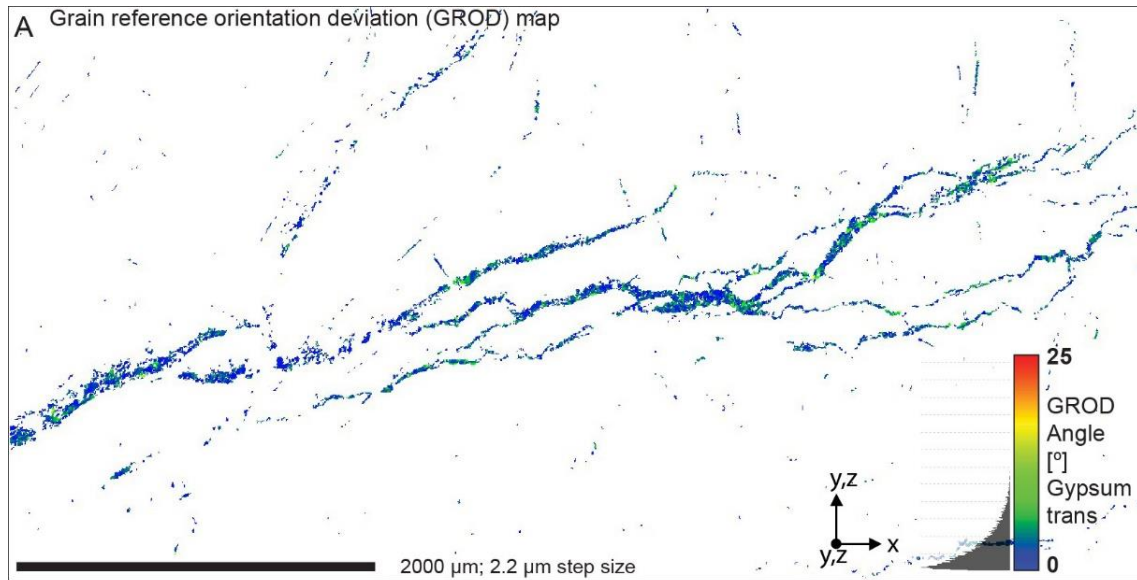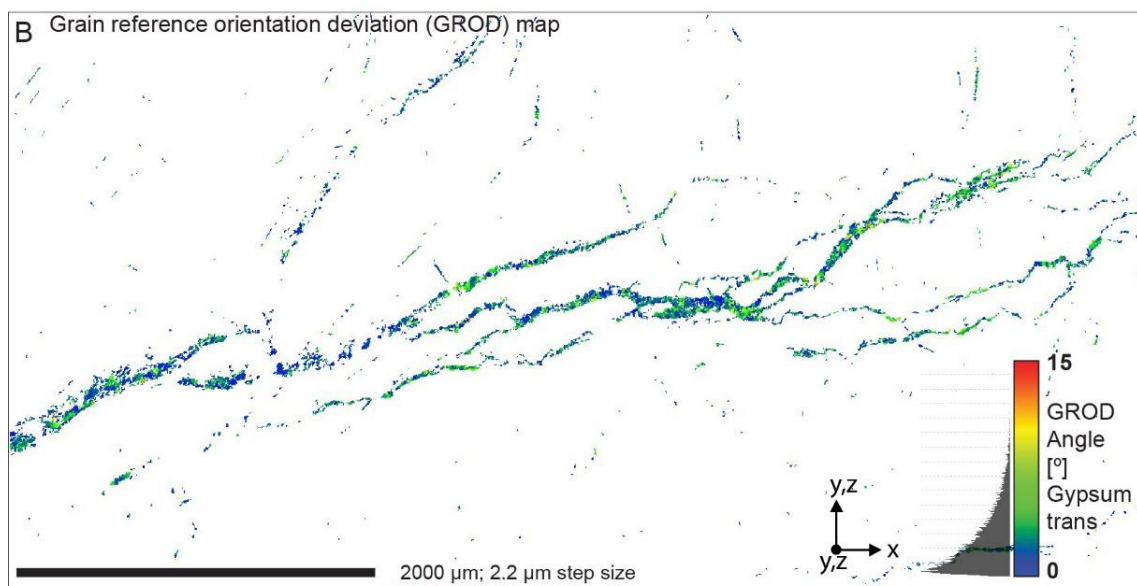

$$\sigma_1 \rightarrow \leftarrow \sigma_1$$

60 **Fig. S9: Grain reference orientation deviation (GROD) maps of vein-hosted gypsum from the Area 1 electron backscatter diffraction dataset of Ò3 (post ‘wet’ mode experiment). Component limits (GROD angle) were at a range of 0 to 25° for A and to 0 to 15° for B. Exclusion of higher angles results in loss of data and is more sensitive to low angle heterogeneities.**



Summary grain statistics

|       |         |                          | no grains | Grains%  | Area     | %         | AVG d    | STDV d   | AVG slope | STDV slop | AVG AR   | STDV AR  |
|-------|---------|--------------------------|-----------|----------|----------|-----------|----------|----------|-----------|-----------|----------|----------|
| anh   | 2       | 23453                    | 23452     | 90.76905 | 1.03E+07 | 9.508E+01 | 16.86657 | 16.54946 | 84.1283   | 51.02407  | 2.082103 | 0.896492 |
| gyp   | 23454   | 25838                    | 2385      | 9.230948 | 5.33E+05 | 4.923E+00 | 14.70951 | 8.242795 | 74.57741  | 49.84299  | 2.15751  | 1.020427 |
| total |         |                          | 25837     |          | 1.08E+07 |           |          |          |           |           |          |          |
| EX    | 16.62   | Average, expectation     |           |          |          |           |          |          |           |           |          |          |
| D²X   | 249.65  | Variance, dispersion     |           |          |          |           |          |          |           |           |          |          |
| s     | 15.8    | Standard deviation       |           |          |          |           |          |          |           |           |          |          |
| s/EX  | 0.95066 | Coefficient of variation |           |          |          |           |          |          |           |           |          |          |
| Xmin  | 7.8501  | Minimum value            |           |          |          |           |          |          |           |           |          |          |
| Xmax  | 506.27  | Maximum value            |           |          |          |           |          |          |           |           |          |          |
| N     | 25760   | Size of the data set     |           |          |          |           |          |          |           |           |          |          |

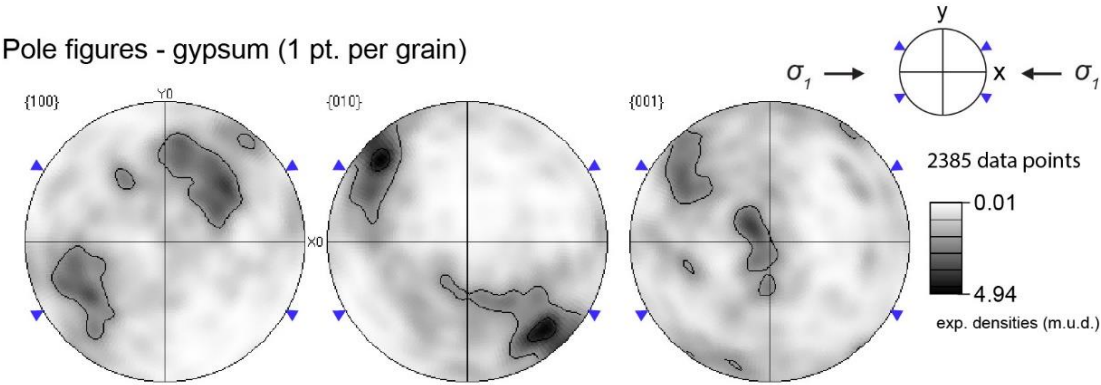

65

**Fig. S10:** Grain statistical data and one point per grain, equal area, lower hemisphere pole figures of gypsum from analysis of the electron backscatter diffraction data set of Area 1 in sample Ò3 (post ‘wet’ mode experiment).

70



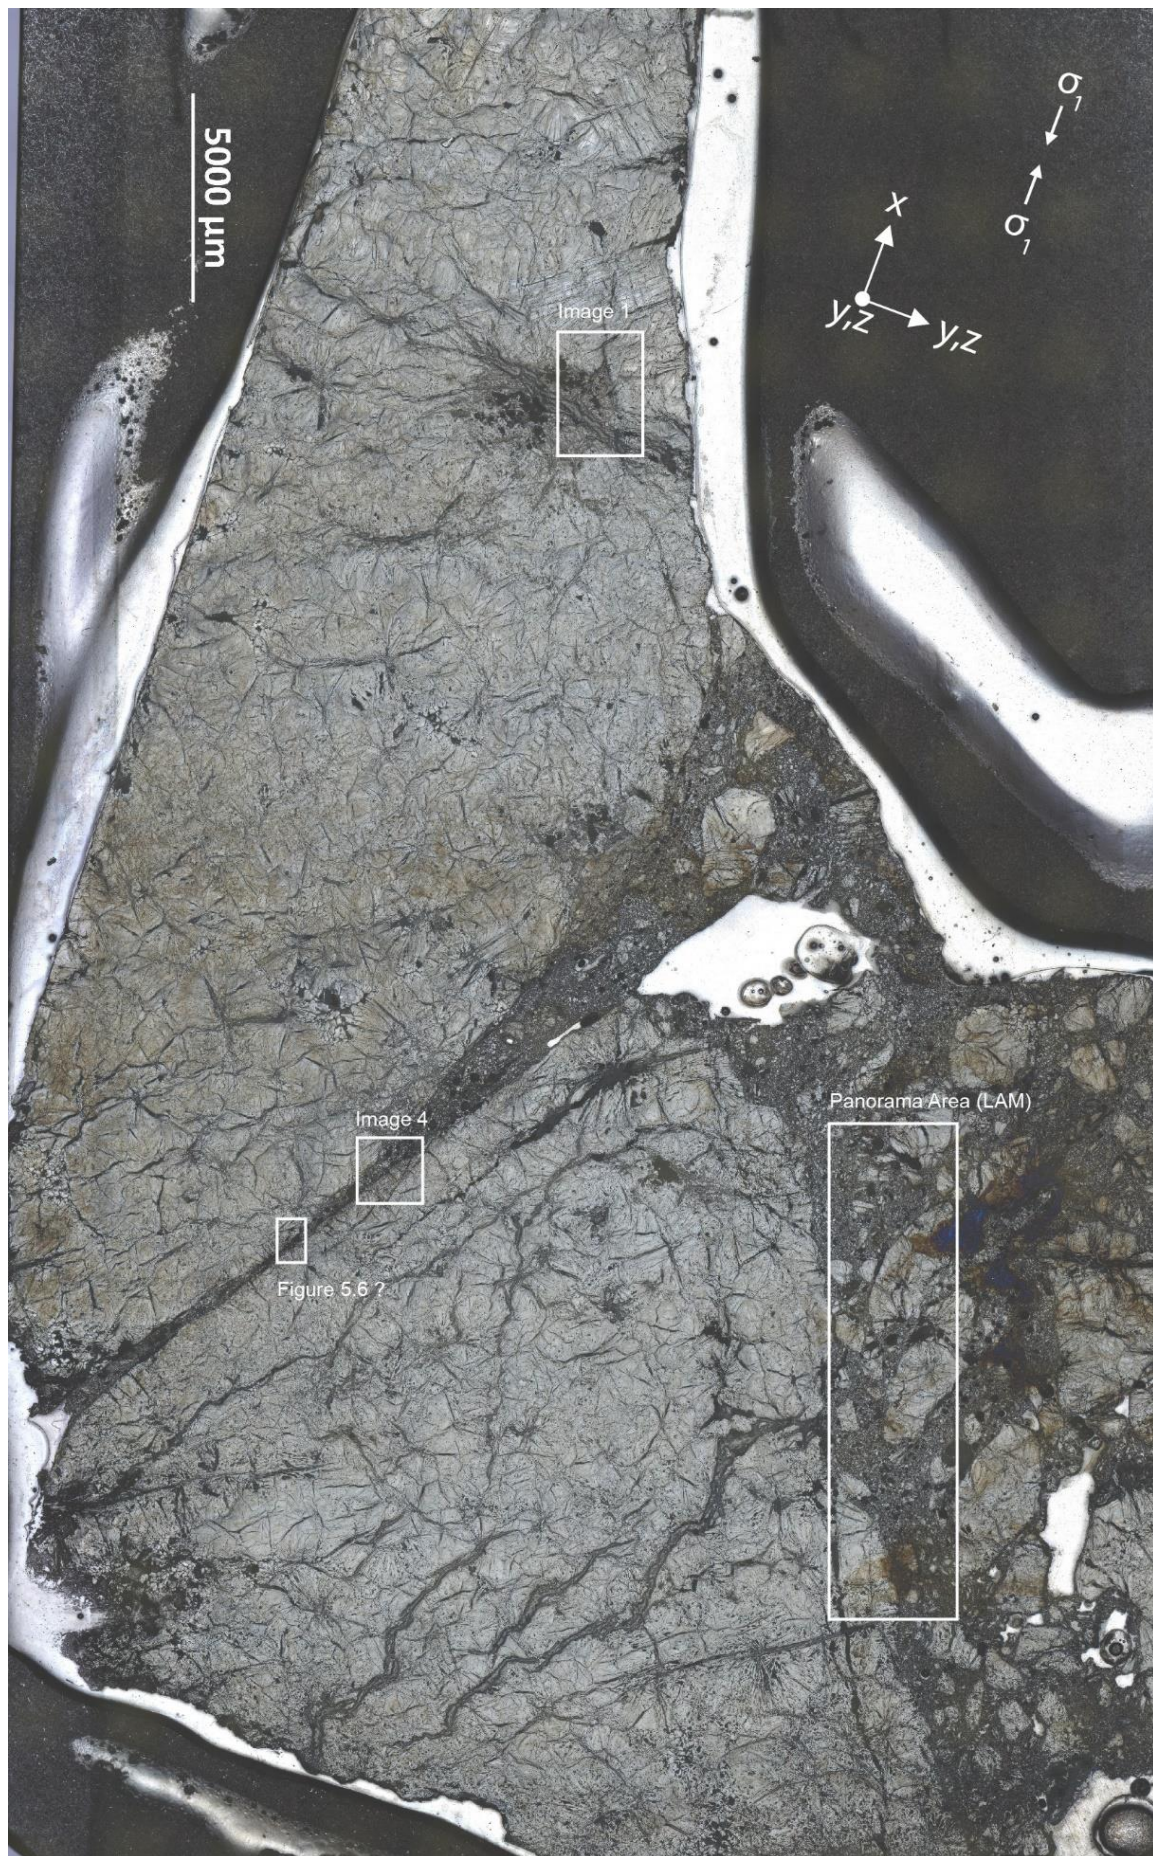

Fig. S11: Reflected light microscopy images of a thin section of sample 02 (post ssdc mode experiment) with areas marked where further analysis was done. The area marked as Figure 5.6? is an estimate, as the thin section was polished for EBSD between imaging.



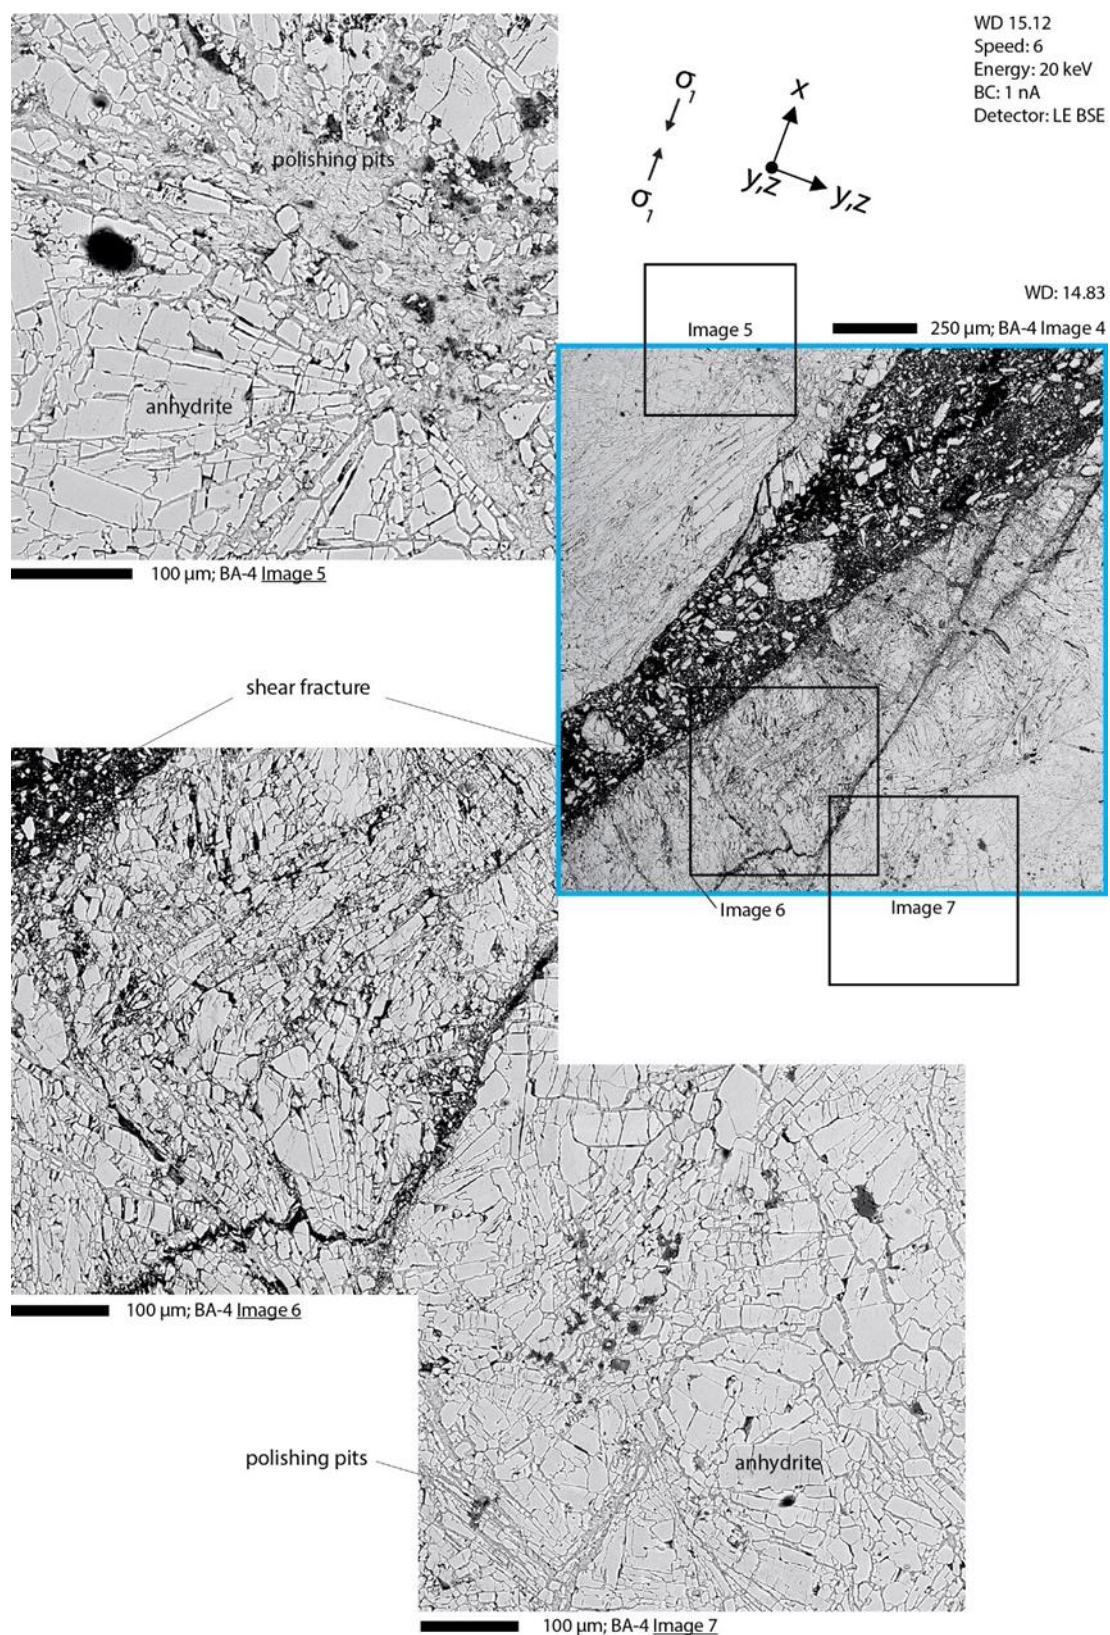

Fig. S12: Backscatter electron images of O<sub>2</sub> after ssdc. Image 4: shear fracture map, location marked in Figure S11. Image 5: ~ 100 μm wide polishing pit (gypsum vein that lost gypsum due to polishing), and spherulitic radial anhydrite laths. Image 6: cataclastic zone with shear bands between the open shear fracture (no matrix, filled with clasts). A long fracture divides the cataclastic zone (Image 6) from the intact fabric of Image 7.



A

Panorama Area

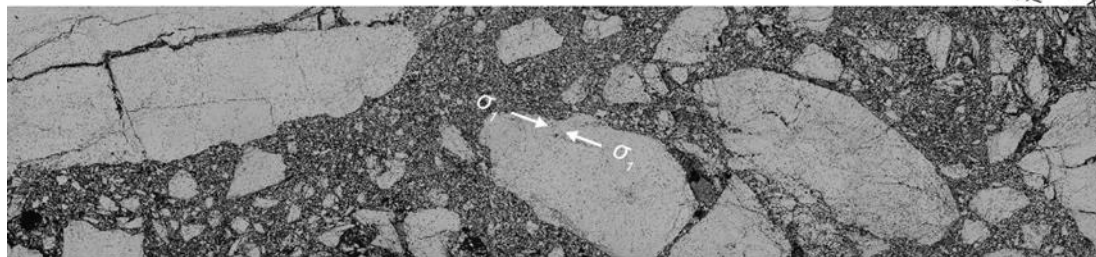

1 mm; WD 15.35 mm

B

LAM Area1\_0\_0

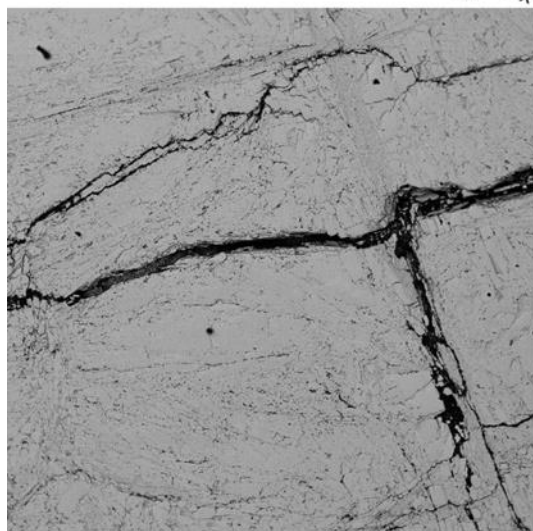

500  $\mu$ m; WD 15.35 mm

LAM Area1\_1\_0

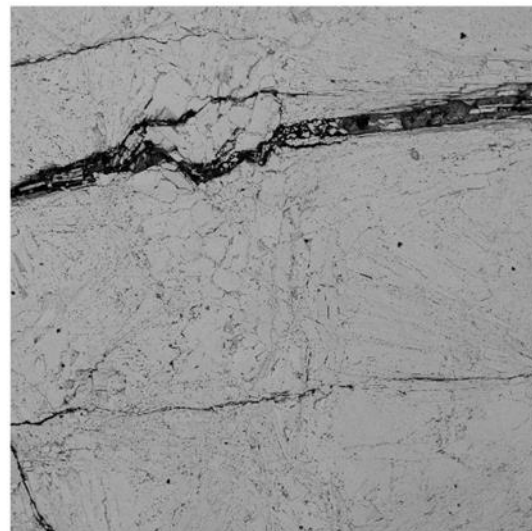

500  $\mu$ m; WD 15.35 mm

LAM Area1\_0\_1

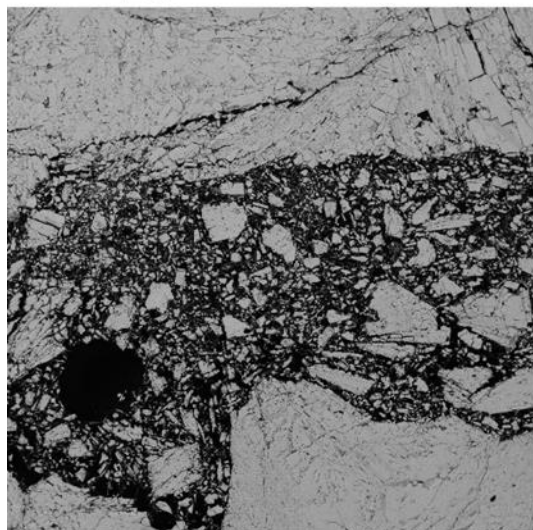

500  $\mu$ m; WD 15.35 mm

LAM Area1\_1\_1

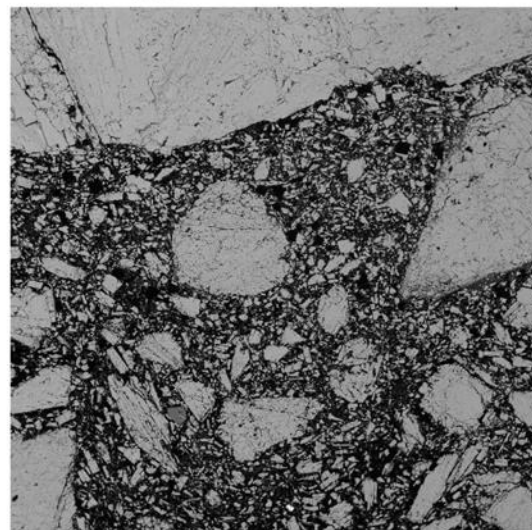

500  $\mu$ m; WD 15.35 mm



C

LAM Area1\_2\_0

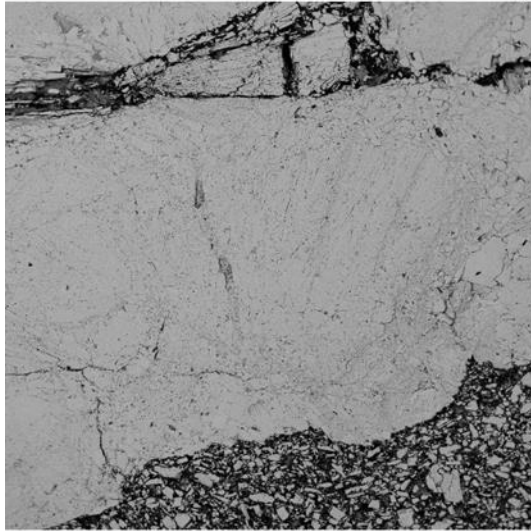

500  $\mu$ m; WD 15.35 mm

LAM Area1\_3\_0

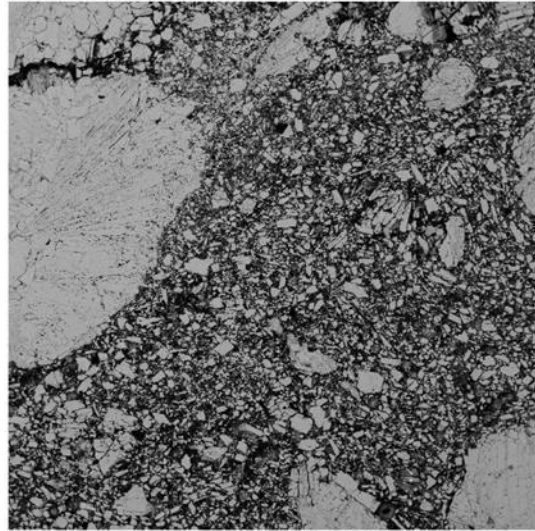

500  $\mu$ m; WD 15.35 mm

LAM Area1\_2\_1

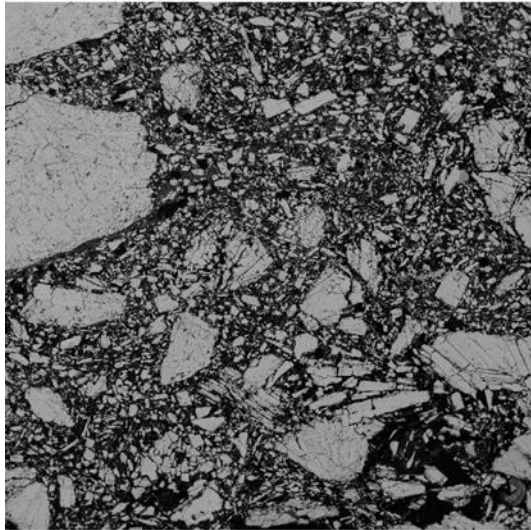

500  $\mu$ m; WD 15.35 mm

LAM Area1\_3\_1

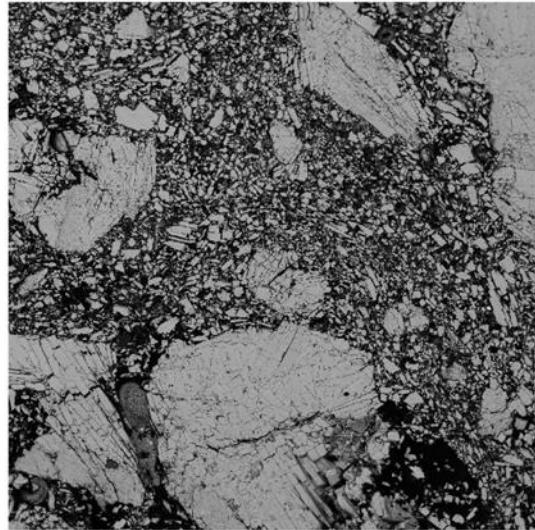

500  $\mu$ m; WD 15.35 mm



D

LAM Area1\_4\_0

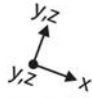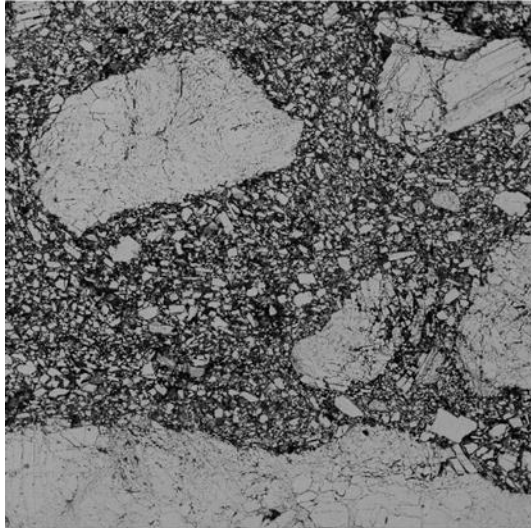

500  $\mu$ m; WD 15.35 mm

LAM Area1\_5\_0

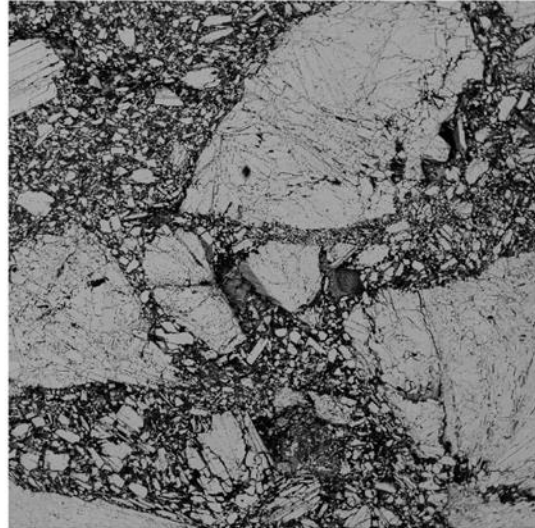

500  $\mu$ m; WD 15.35 mm

LAM Area1\_4\_1

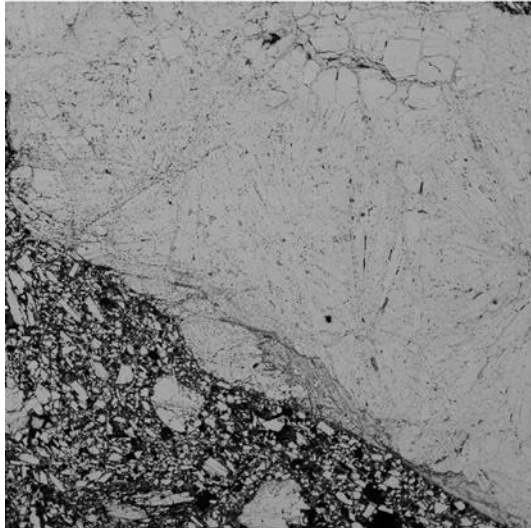

500  $\mu$ m; WD 15.35 mm

LAM Area1\_5\_1

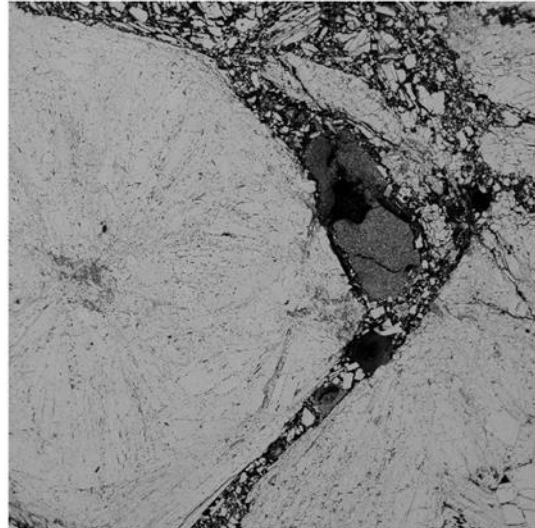

500  $\mu$ m; WD 15.35 mm



E

LAM Area1\_6\_0

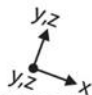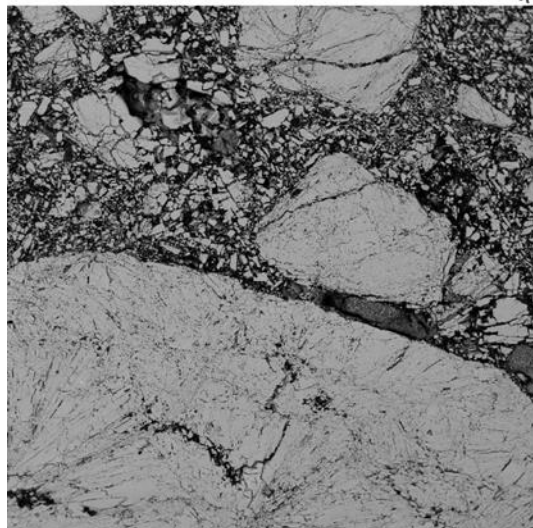

500  $\mu\text{m}$ ; WD 15.35 mm

LAM Area1\_7\_0

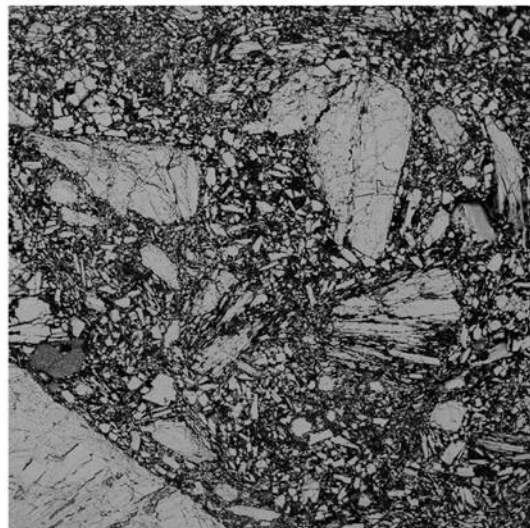

500  $\mu\text{m}$ ; WD 15.35 mm

LAM Area1\_6\_1

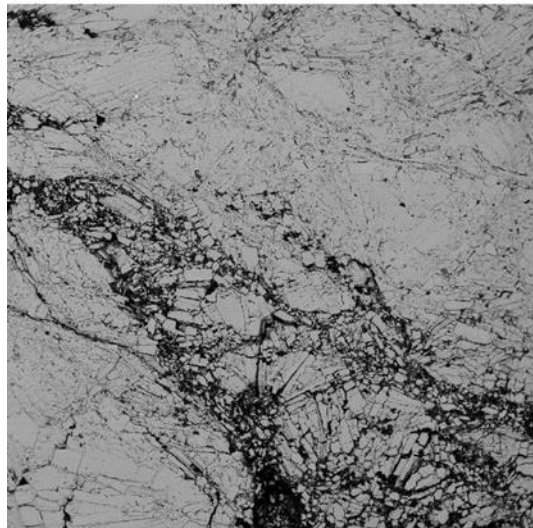

500  $\mu\text{m}$ ; WD 15.35 mm

LAM Area1\_7\_1

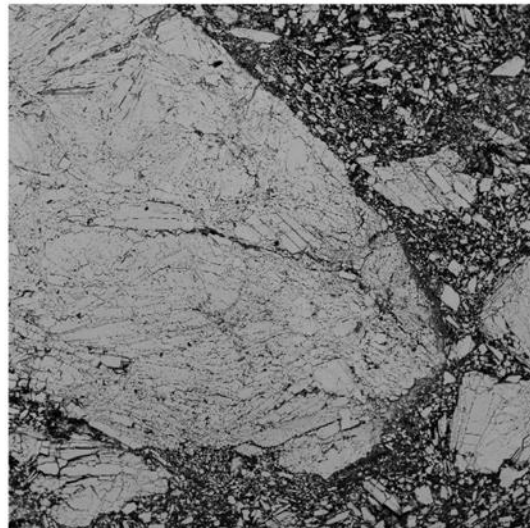

500  $\mu\text{m}$ ; WD 15.35 mm



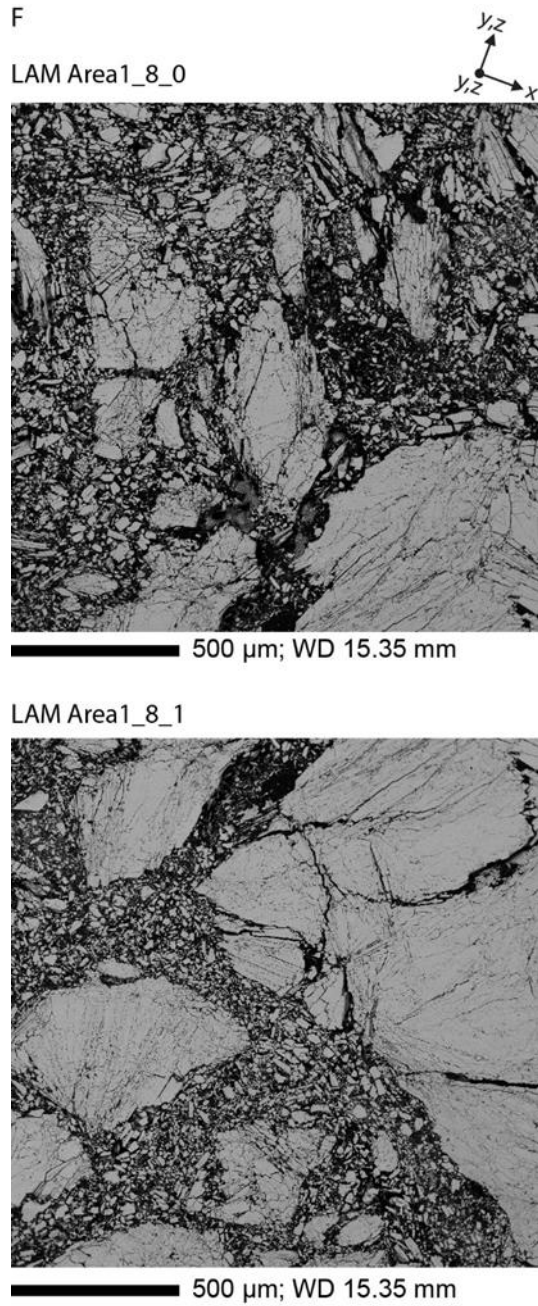

**Fig. S13: Backscatter electron panorama of a cataclastic shear zone in Ö2 after steady state differential compaction. A: Panorama, B to F single panorama frames. Light grey: anhydrite, medium grey: gypsum, black: open fractures. A mixed matrix of < 100 µm sized gypsum and anhydrite particles contains up to millimetre-scale anhydrite clasts with intense internal fracturing and low gypsum content. The amount of gypsum is difficult to identify from the images, as the sample lost gypsum due to polishing. The location of the panorama is marked as Panorama Area (LAM) in Figure A11.**

95



Crystallographic orientation map

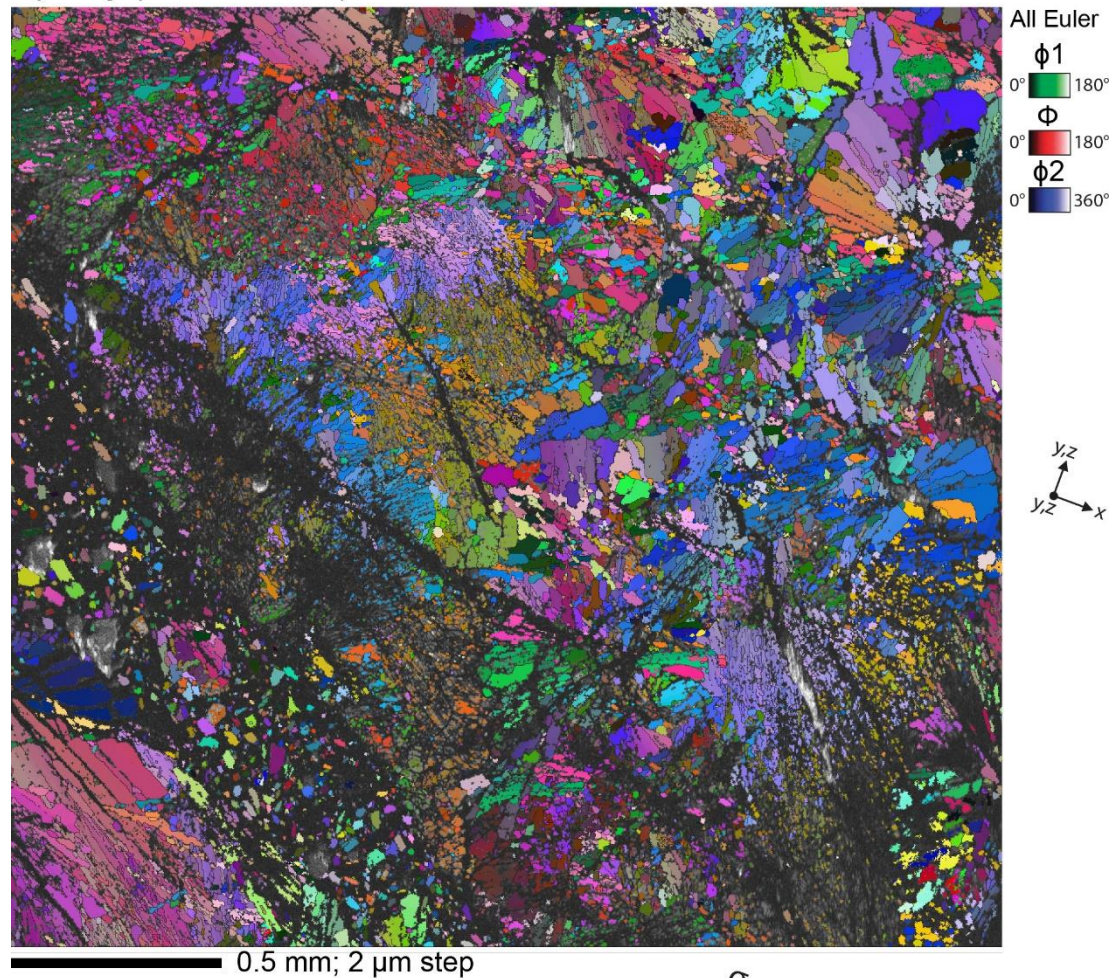

Grain shape map

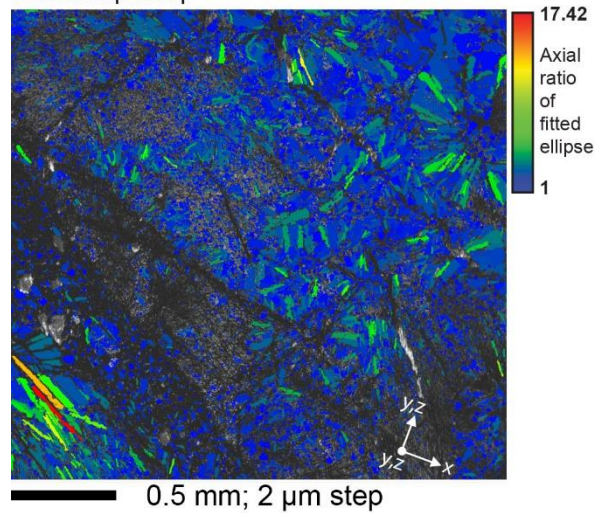

Shape preferred orientation map

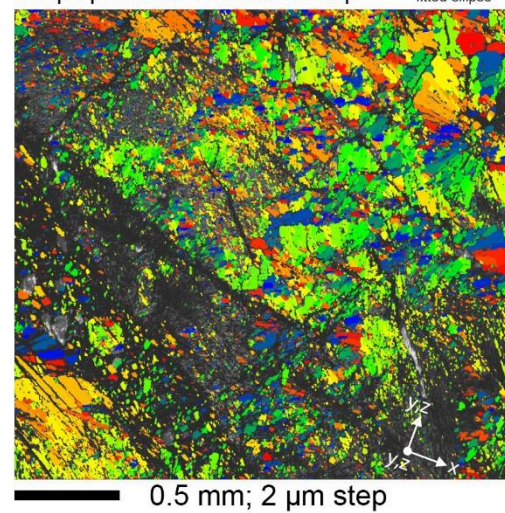

Fig. S14: Electron backscatter diffraction analysis of a cataclastic shear zone and surrounding fabric with spherulites in sample Ö2 after steady state differential compaction. Gypsum was not detected, due to polishing pits.



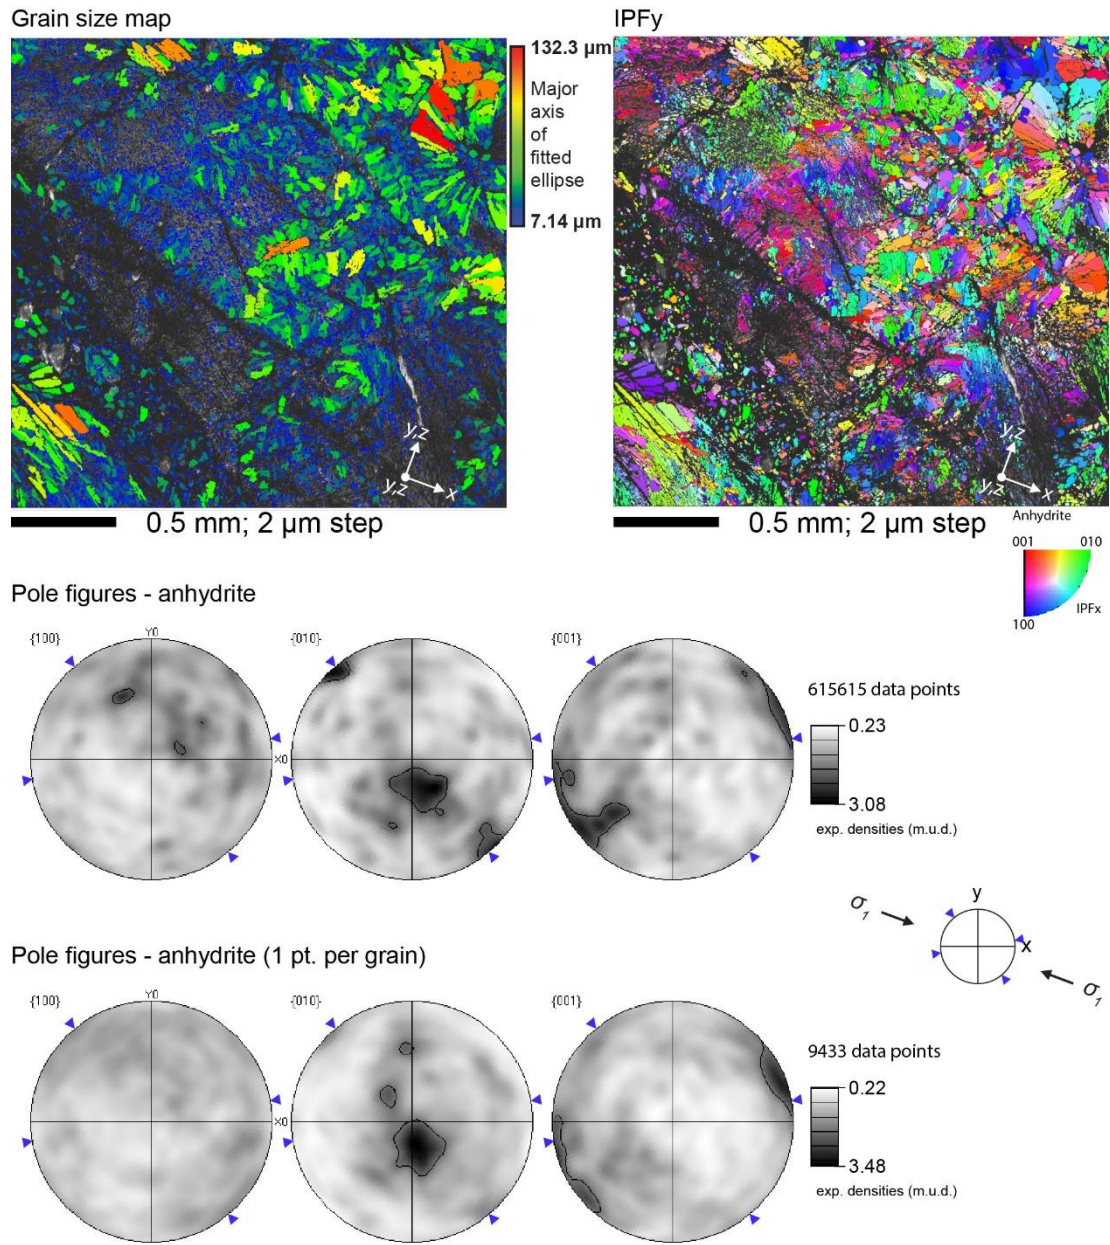

Fig. S15: Second part of backscatter diffraction analysis of a cataclastic shear zone in sample 02. Equal area, lower hemisphere pole figures of anhydrite based on the complete dataset and based on 1 point per grain subset.



A

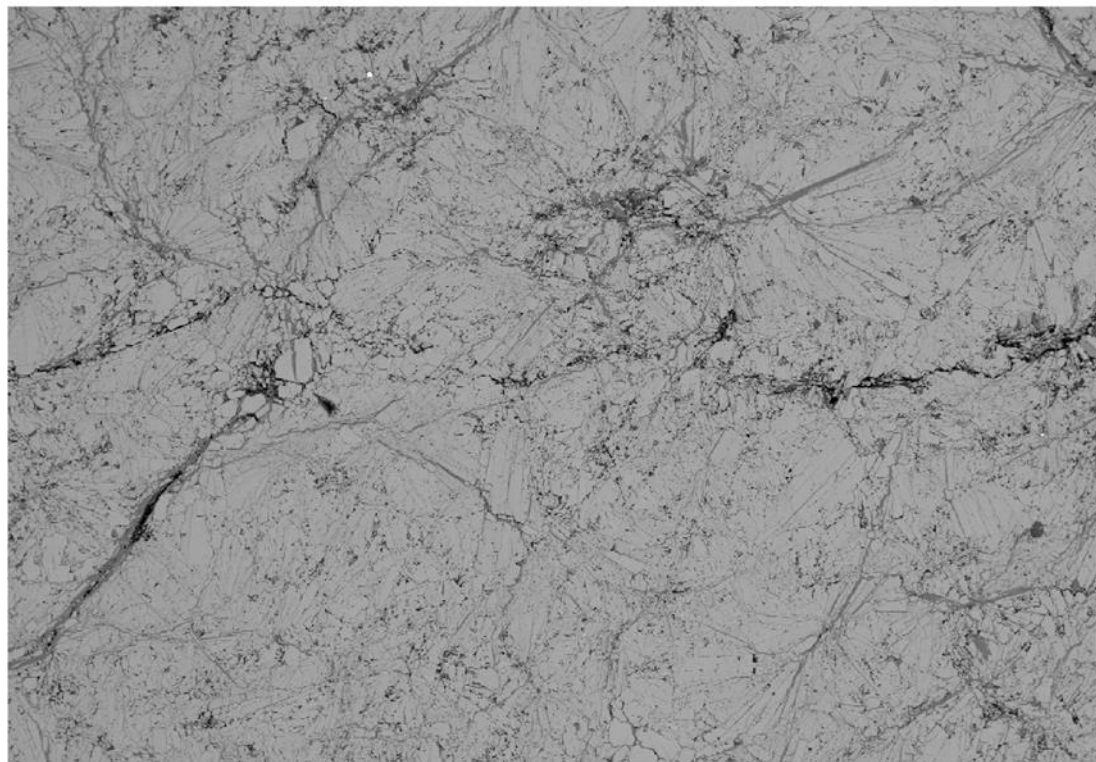

500 µm; WD = 10.7 mm; 15.00 kV; Image 2

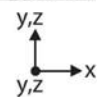

B

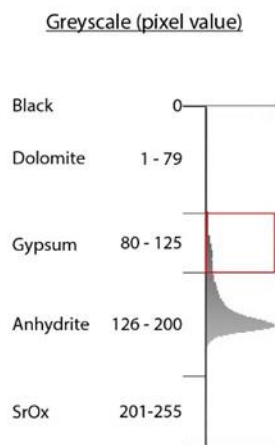

C

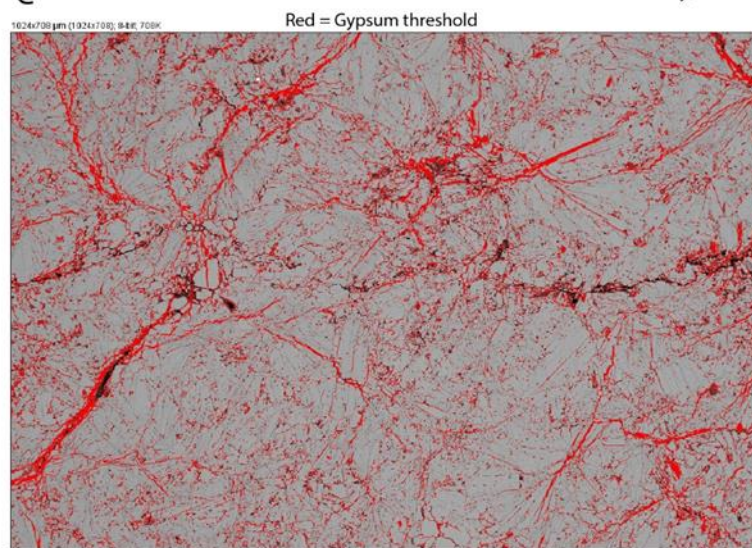

500 µm; WD = 10.7 mm; 15.00 kV; Image 2

**Fig. S16: Phase content analysis via greyscale threshold (ImageJ) from A: backscatter electron Image 2 of Òdena quarry sample Ò8 (AA-3). This sample went through a dry mode test and no signs of new formed gypsum was found. B: Greyscale threshold settings defined to quantify %. SrOx = accessory phases. C: Image 2 with all pixels that fall into the gypsum threshold in red. See table A1 for further results.**

110

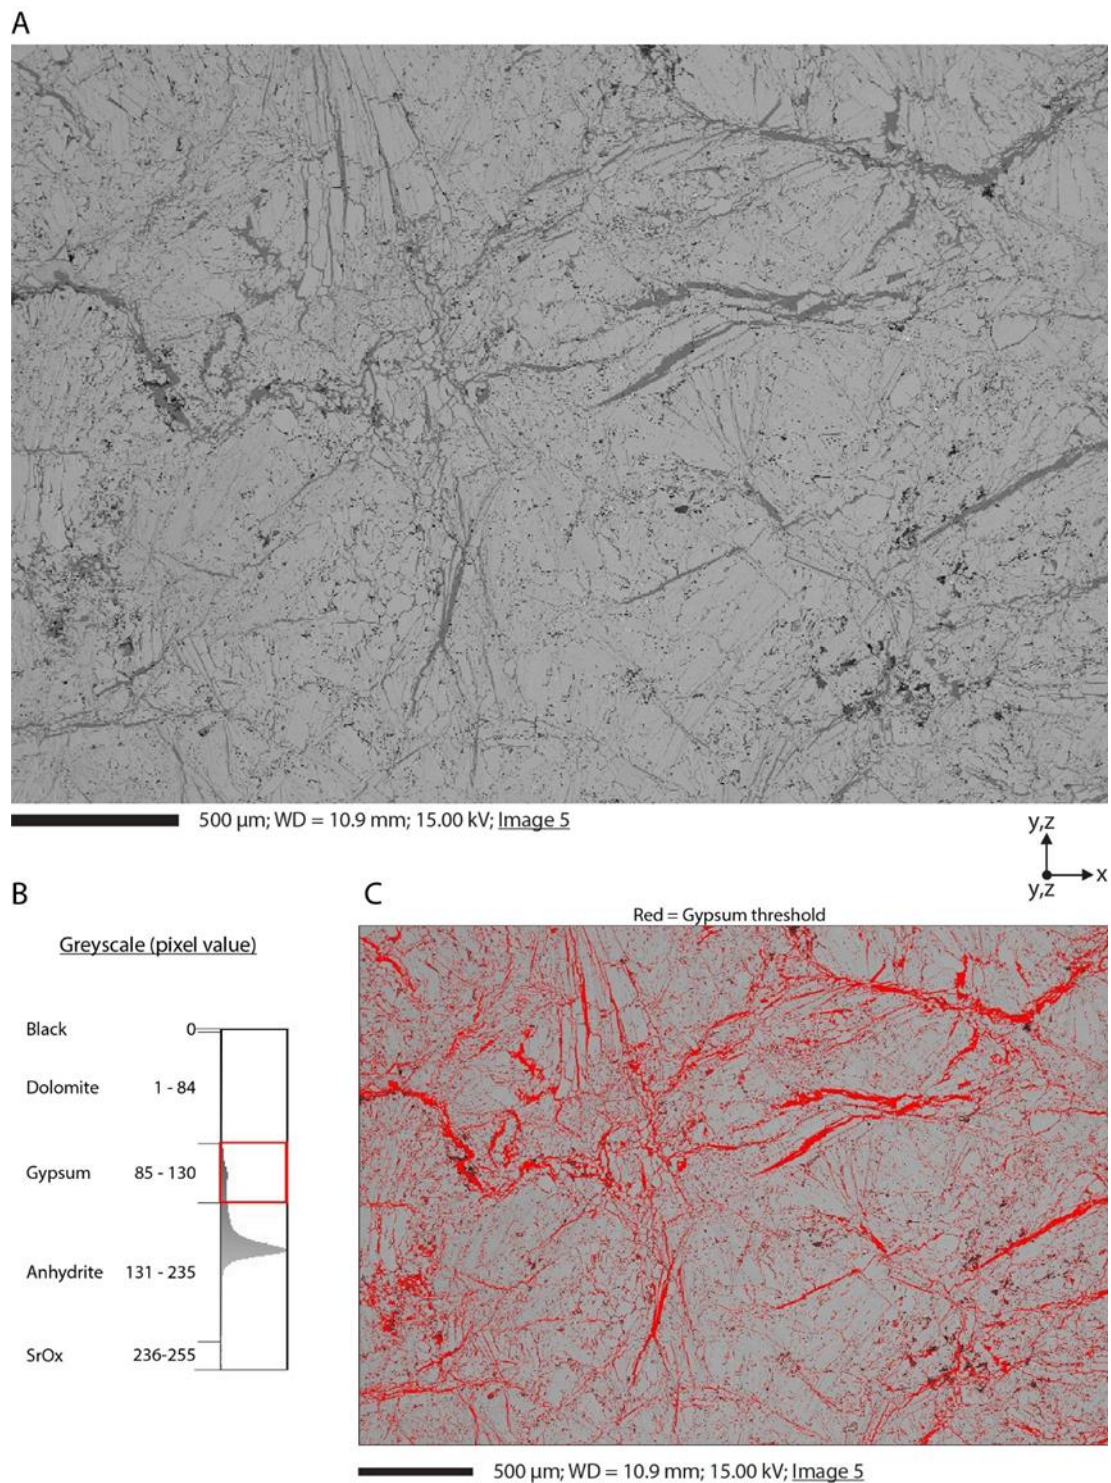

**Fig. S17: Phase content analysis via greyscale threshold (ImageJ) from A: backscatter electron Image 5 of Òdena quarry sample Ò8 (AA-3). B: Greyscale threshold settings defined to quantify %. SrOx = accessory phases. C: Image 5 with all pixels that fall into the gypsum threshold in red. See table A1 for further results.**



A

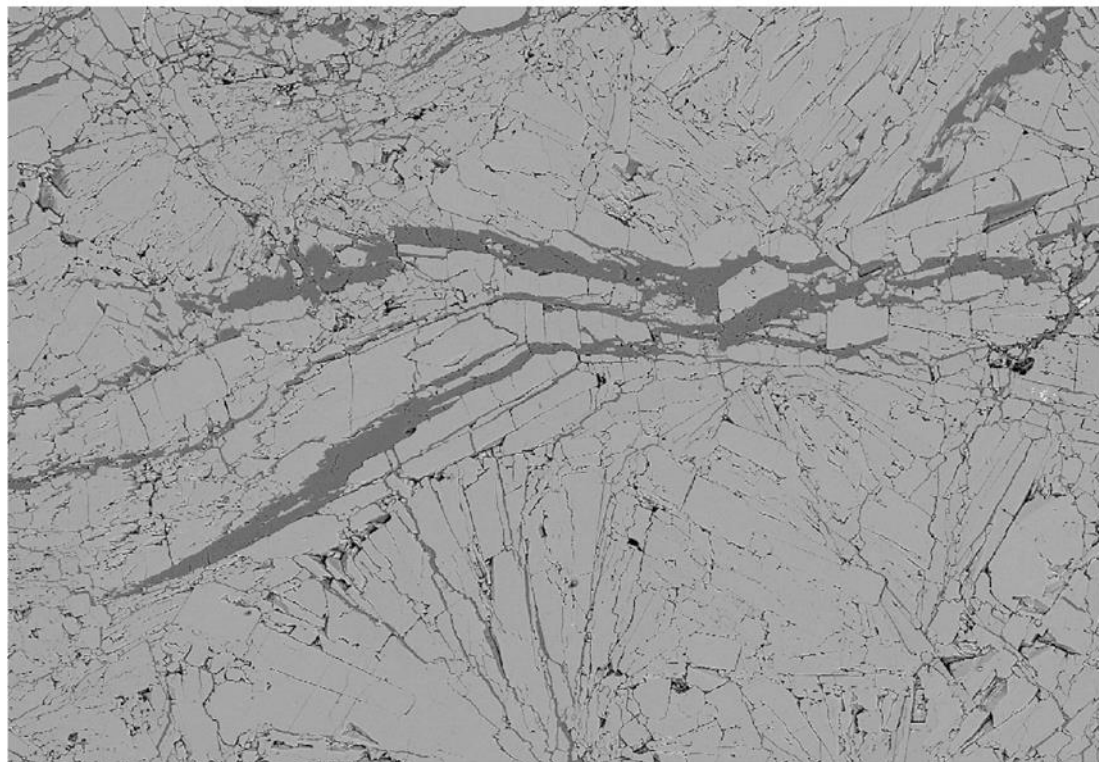

B

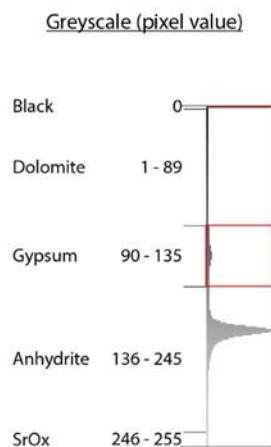

C

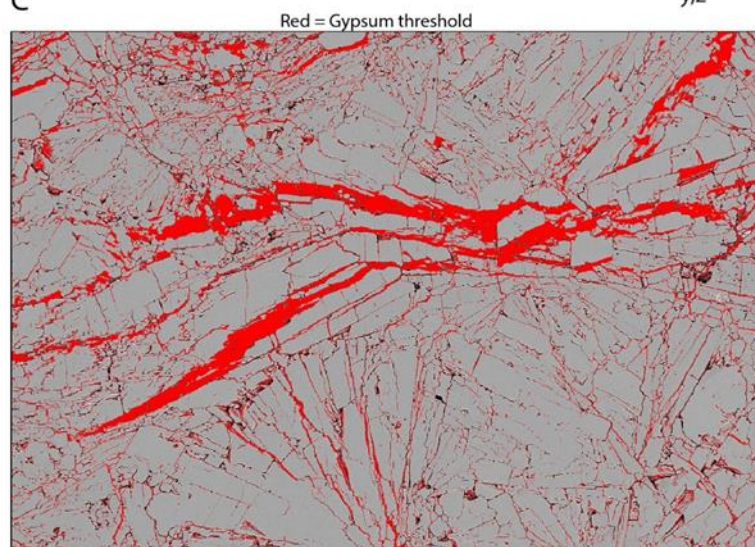

250 µm; WD = 10.9 mm; 15.00 kV; Image 6

**Fig. S18: Phase content analysis via greyscale threshold (ImageJ) from A: backscatter electron Image 6 of Òdena quarry sample Ò8 (AA-3). B: Greyscale threshold settings defined to quantify %. SrOx = accessory phases. C: Image 6 with all pixels that fall into the gypsum threshold in red. See table A1 for further results.**

120



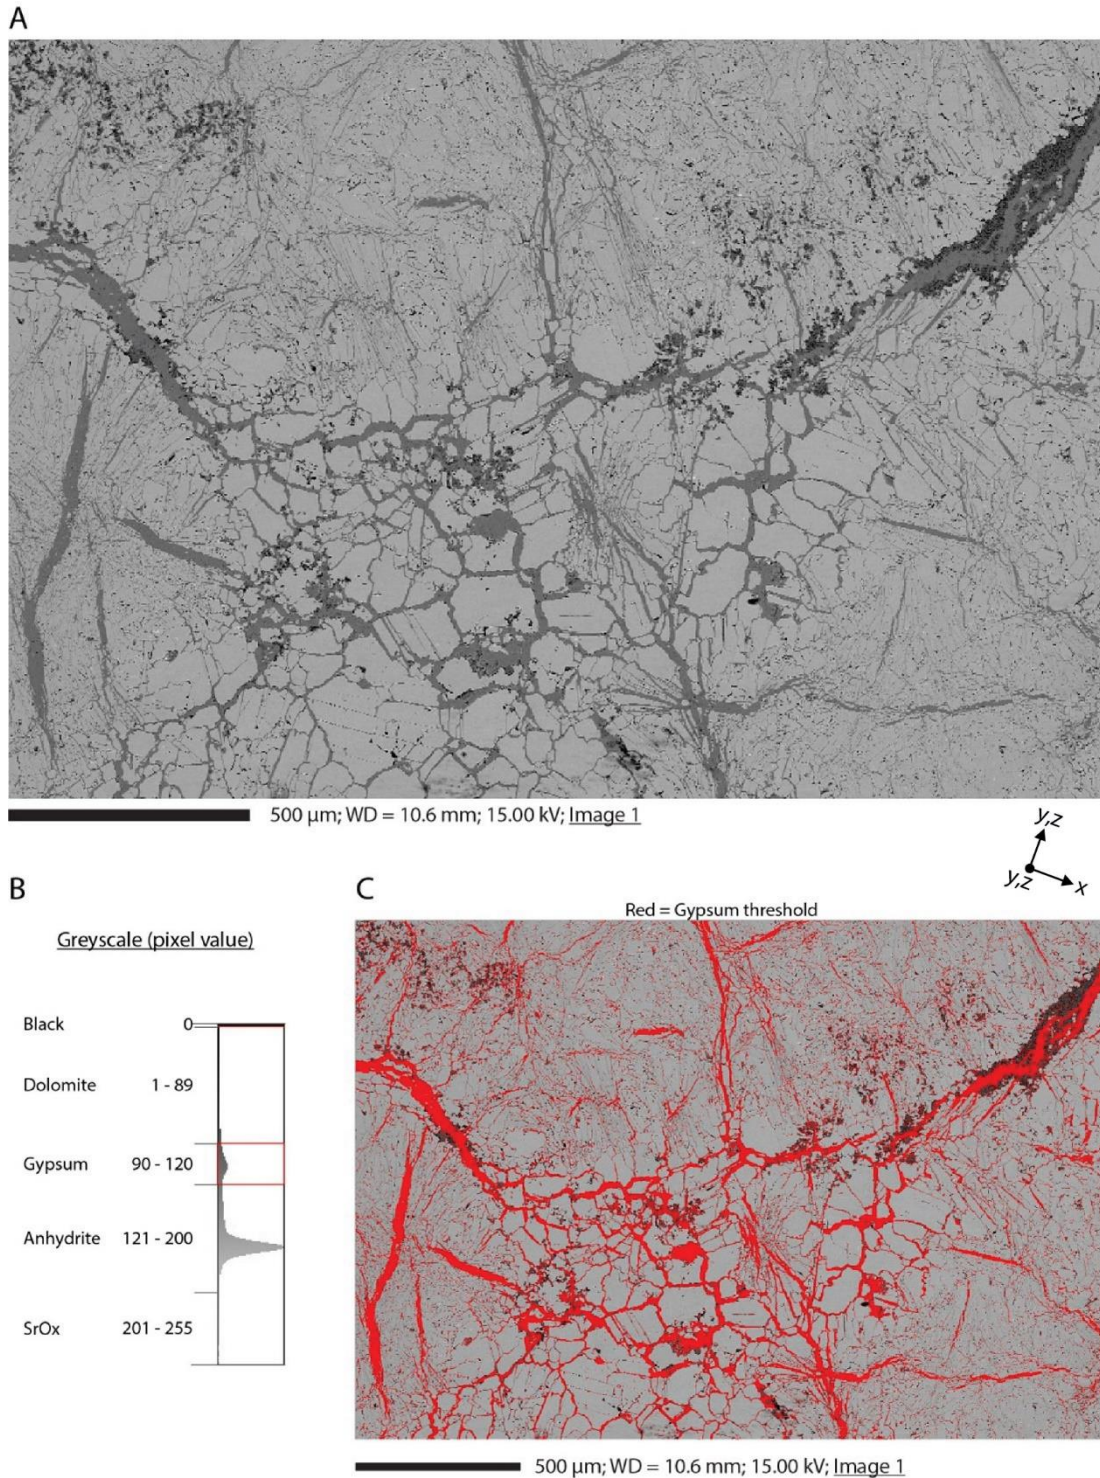

**Fig. S19: Phase content analysis via greyscale threshold (ImageJ) from A: backscatter electron Image 1 of Òdena quarry sample Ò2 (BA-4) after steady state differential compaction (ssdc). The section where Image 1 was taken is from a part of the sample that shows no sign of shear fractures. B: Greyscale threshold settings defined to quantify %. SrOx = accessory phases. C: Image 1 with all pixels that fall into the gypsum threshold in red. See table A1 for further results. The location of the image is marked as 'Image 1' in Figure A11.**



135

140

**Table S1: Phase content greyscale threshold analysis on four backscatter electron images from two Òdena quarry samples from sections with no visible impact from deformation or hydration. Image 1 is from BA-4h (Ò2) after steady state differential compaction, but from a section that shows no sign of hydration through the experiment. Figures A16 to A19 present the Images and thresholds used for the analysis. Hal = halite, gyp = gypsum, dol = dolomite, SrO<sub>x</sub> = accessory phases, black = open fractures. Deviation = difference between the image area and the sum of the pixels that were sorted by the greyscale threshold. SUM is the content calculated by adding phase area up, meaning that the different images were treated as one. Mean is the statistic mean of all four grey scale threshold case studies, and STDEV is the corresponding standard deviation. The marked values (bold) are the data used as initial material phase content for Òdena quarry anhydrite in the study.**

|                                          | Ò8 (AA-3) |            |           | Ò2 (BA-4)  |             |              |              |              |              |
|------------------------------------------|-----------|------------|-----------|------------|-------------|--------------|--------------|--------------|--------------|
|                                          | Image 2   | Image 5    | Image 6   | Image 1    | <i>SUM</i>  | <i>Mean</i>  | <i>STDEV</i> | <i>STDEV</i> | <i>STDEV</i> |
| Image Area [px <sup>2</sup> ]            | 724992    | 724992     | 724992    | 724992     | 2899968     |              |              |              |              |
| Image Area [µm <sup>2</sup> ]            | 724992.00 | 7080000.00 | 875482.57 | 2837203.17 | 11517677.74 |              |              |              |              |
| Anh Area [µm <sup>2</sup> ]              | 616855.00 | 5943632.86 | 720518.20 | 2283682.42 | 9564688.49  |              |              |              |              |
| Gyp Area [µm <sup>2</sup> ]              | 87018.00  | 962200.66  | 111973.72 | 403149.46  | 1564341.84  | 391085.46    | 406890.03    |              |              |
| Dol Area [µm <sup>2</sup> ]              | 20165.00  | 168674.00  | 39121.10  | 139005.57  | 366965.67   | 91741.42     | 73131.40     |              |              |
| SrO <sub>x</sub> Area [µm <sup>2</sup> ] | 96.00     | 175.78     | 227.08    | 5008.77    | 5507.63     | 1376.91      | 2421.84      |              |              |
| Black [µm <sup>2</sup> ]                 | 858.00    | 5215.01    | 3654.93   | 6351.00    | 16078.93    | 4019.73      | 2379.99      |              |              |
| Sum [µm <sup>2</sup> ]                   | 724992.00 | 7079898.32 | 875495.03 | 2837197.22 | 11517582.57 | 2879395.64   | 2961028.89   |              |              |
| Deviation [µm <sup>2</sup> ]             | 0.00      | 101.68     | -12.46    | 5.96       | 95.17       |              |              |              |              |
| Deviation [%]                            | 0.00      | 0.00       | 0.00      | 0.00       | 0.00083     | 0.00         | 0.00         |              |              |
| Anh [%]                                  | 85.08     | 83.95      | 82.30     | 80.49      | 83.04       | <b>82.96</b> | 2.00         |              |              |
| Gyp [%]                                  | 12.00     | 13.59      | 12.79     | 14.21      | 13.58       | <b>13.15</b> | 0.96         |              |              |
| Dol [%]                                  | 2.78      | 2.38       | 4.47      | 4.90       | 3.19        | <b>3.63</b>  | 1.24         |              |              |
| SrO <sub>x</sub> [%]                     | 0.01      | 0.00       | 0.03      | 0.18       | 0.05        | <b>0.05</b>  | 0.08         |              |              |
| Black [%]                                | 0.12      | 0.07       | 0.42      | 0.22       | 0.14        | <b>0.21</b>  | 0.15         |              |              |

145
